# Supplementary material for: Lung cancer survivors’ views on telerehabilitation following curative intent therapy: a formative qualitative study
Source: PubMed Central journal article supplement — BMJ Open. 2023 Jun 23;13(6):e073251. doi: 10.1136/bmjopen-2023-073251 (PMC10314696; doi:10.1136/bmjopen-2023-073251), 2023-06-23
Supplement: bmjopen-2023-073251.draft_revisions.pdf [file bmjopen-2023-073251.draft_revisions.pdf]

# BMJ Open

BMJ Open is committed to open peer review. As part of this commitment we make the peer review history of every article we publish publicly available.

When an article is published we post the peer reviewers' comments and the authors' responses online. We also post the versions of the paper that were used during peer review. These are the versions that the peer review comments apply to.

The versions of the paper that follow are the versions that were submitted during the peer review process. They are not the versions of record or the final published versions. They should not be cited or distributed as the published version of this manuscript.

BMJ Open is an open access journal and the full, final, typeset and author-corrected version of record of the manuscript is available on our site with no access controls, subscription charges or pay-per-view fees (<http://bmjopen.bmj.com>).

If you have any questions on BMJ Open's open peer review process please email [info.bmjopen@bmj.com](mailto:info.bmjopen@bmj.com)

# BMJ Open

## Lung Cancer Survivors' Views on Telerehabilitation Following Curative Intent Therapy: A Formative Qualitative Study

|                               |                                                                                                                                                                                                                                                                                                                                                                                                                                                                                                                                                                                                                                                                                                                                    |
|-------------------------------|------------------------------------------------------------------------------------------------------------------------------------------------------------------------------------------------------------------------------------------------------------------------------------------------------------------------------------------------------------------------------------------------------------------------------------------------------------------------------------------------------------------------------------------------------------------------------------------------------------------------------------------------------------------------------------------------------------------------------------|
| Journal:                      | <i>BMJ Open</i>                                                                                                                                                                                                                                                                                                                                                                                                                                                                                                                                                                                                                                                                                                                    |
| Manuscript ID                 | bmjopen-2023-073251                                                                                                                                                                                                                                                                                                                                                                                                                                                                                                                                                                                                                                                                                                                |
| Article Type:                 | Original research                                                                                                                                                                                                                                                                                                                                                                                                                                                                                                                                                                                                                                                                                                                  |
| Date Submitted by the Author: | 27-Feb-2023                                                                                                                                                                                                                                                                                                                                                                                                                                                                                                                                                                                                                                                                                                                        |
| Complete List of Authors:     | Ha, Duc; Rocky Mountain Regional VA Medical Center, Nunnery, Mary; Rocky Mountain Regional VA Medical Center Klocko, Robert; Rocky Mountain Regional VA Medical Center Haverhals, Leah; Rocky Mountain Regional VA Medical Center Bekelman, David; Rocky Mountain Regional VA Medical Center New, Melissa; Rocky Mountain Regional VA Medical Center Randhawa, Simran; Rocky Mountain Regional VA Medical Center Stevens-Lapsley, Jennifer; University of Colorado Denver - Anschutz Medical Campus, Physical Medicine & Rehabilitation Studts, Jamie; University of Colorado Denver School of Medicine, Prochazka, Allan; University of Colorado Anschutz Medical Campus Keith, Robert; Rocky Mountain Regional VA Medical Center |
| Keywords:                     | Telemedicine < BIOTECHNOLOGY & BIOINFORMATICS, REHABILITATION MEDICINE, QUALITATIVE RESEARCH                                                                                                                                                                                                                                                                                                                                                                                                                                                                                                                                                                                                                                       |
|                               |                                                                                                                                                                                                                                                                                                                                                                                                                                                                                                                                                                                                                                                                                                                                    |

SCHOLARONE™  
Manuscripts

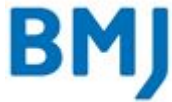

I, the Submitting Author has the right to grant and does grant on behalf of all authors of the Work (as defined in the below author licence), an exclusive licence and/or a non-exclusive licence for contributions from authors who are: i) UK Crown employees; ii) where BMJ has agreed a CC-BY licence shall apply, and/or iii) in accordance with the terms applicable for US Federal Government officers or employees acting as part of their official duties; on a worldwide, perpetual, irrevocable, royalty-free basis to BMJ Publishing Group Ltd ("BMJ") its licensees and where the relevant Journal is co-owned by BMJ to the co-owners of the Journal, to publish the Work in this journal and any other BMJ products and to exploit all rights, as set out in our [licence](#).

The Submitting Author accepts and understands that any supply made under these terms is made by BMJ to the Submitting Author unless you are acting as an employee on behalf of your employer or a postgraduate student of an affiliated institution which is paying any applicable article publishing charge ("APC") for Open Access articles. Where the Submitting Author wishes to make the Work available on an Open Access basis (and intends to pay the relevant APC), the terms of reuse of such Open Access shall be governed by a Creative Commons licence – details of these licences and which [Creative Commons](#) licence will apply to this Work are set out in our licence referred to above.

Other than as permitted in any relevant BMJ Author's Self Archiving Policies, I confirm this Work has not been accepted for publication elsewhere, is not being considered for publication elsewhere and does not duplicate material already published. I confirm all authors consent to publication of this Work and authorise the granting of this licence.

1  
2  
3 *Title*  
4  
5

6 Lung Cancer Survivors' Views on Telerehabilitation Following Curative Intent Therapy: A  
7  
8 Formative Qualitative Study  
9  
10

11  
12  
13 *Authors*  
14  
15

16 Duc M. Ha, MD, MAS<sup>1,2\*</sup>; Mary A. Nunnery, MPH, CCRC<sup>3</sup>; Robert P. Klocko, MA<sup>3</sup>; Leah M.  
17 Haverhals, PhD, MA<sup>3,4</sup>; David B. Bekelman, MD, MPH<sup>1,2,3</sup>; Melissa L. New, MD<sup>1,2</sup>; Simran K.  
18 Randhawa, MBBS<sup>5,6</sup>; Jennifer E. Stevens-Lapsley, PT, PhD<sup>7,8</sup>; Jamie L. Studts, PhD<sup>2,9</sup>; Allan V.  
19 Prochazka, MD, MSc<sup>2</sup>; Robert L. Keith, MD<sup>1,2</sup>  
20  
21  
22  
23  
24  
25  
26  
27

28 *Author affiliations*  
29  
30

31 <sup>1</sup>Medical and Research Service, Rocky Mountain Regional Veterans Affairs Medical Center;  
32 Aurora, Colorado  
33  
34

35  
36 <sup>2</sup>Department of Medicine, University of Colorado Anschutz Medical Campus; Aurora, Colorado  
37

38  
39 <sup>3</sup>Denver-Seattle Center of Innovation for Veteran-Centered & Value-Driven Care, Research  
40 Service, Rocky Mountain Regional Veterans Affairs Medical Center; Aurora, Colorado  
41  
42

43  
44 <sup>4</sup>Division of Health Care Policy and Research, School of Medicine, University of Colorado  
45 Anschutz Medical Campus; Aurora, Colorado  
46  
47

48  
49 <sup>5</sup>Surgical Service, Rocky Mountain Regional Veterans Affairs Medical Center; Aurora, Colorado  
50

51  
52 <sup>6</sup>Division of Thoracic Surgery, Department of Surgery; University of Colorado Anschutz Medical  
53 Campus; Aurora, Colorado  
54  
55

1  
2  
3 <sup>7</sup>Department of Physical Medicine and Rehabilitation, University of Colorado Anschutz Medical  
4  
5 Campus; Aurora, Colorado

6  
7  
8 <sup>8</sup>Geriatric Research, Education, and Clinical Center, Research Service; Rocky Mountain  
9  
10 Regional Veterans Affairs Medical Center; Aurora, Colorado

11  
12  
13 <sup>9</sup>Cancer Prevention and Control, University of Colorado Cancer Center; Aurora, Colorado

14  
15  
16  
17  
18 \*Correspondence: Duc M. Ha, MD, MAS (ORCID 0000-0002-3003-9438); Section of Pulmonary  
19  
20 and Critical Care, Medical Service; Rocky Mountain Regional Veterans Affairs Medical Center;  
21  
22 1700 N Wheeling Street, F2-266 (MC-111A), Aurora, CO 80045, USA; Email: [duc.ha@va.gov](mailto:duc.ha@va.gov),  
23  
24 or [duc.ha@cuanschutz.edu](mailto:duc.ha@cuanschutz.edu)

25  
26  
27  
28  
29  
30  
31  
32  
33 *Running Head*

34  
35  
36 Lung Cancer Survivors' Views on Telerehabilitation

37  
38  
39  
40  
41  
42  
43  
44 *MeSH*

45  
46  
47 Telemedicine, survivorship, rehabilitation, exercise, veterans' health

1  
2  
3 **ABSTRACT** (296 words)  
4  
5  
6

7 **Objectives:** To inform personalized home-based rehabilitation interventions that will improve  
8 health-related quality of life, we sought to gain in-depth understanding of lung cancer survivors'  
9 1) attitudes and perceived self-efficacy towards telemedicine; 2) knowledge of the benefits of  
10 rehabilitation and exercise training; 3) perceived facilitators and preferences for  
11 telerehabilitation; and 4) health goals following curative intent therapy.  
12  
13  
14  
15  
16  
17

18 **Design:** We conducted semi-structured interviews guided by the Social Cognitive Theory and  
19 used directed content analysis to identify salient themes.  
20  
21  
22  
23

24 **Setting:** A single U.S. Veterans Affairs Medical Center.  
25  
26  
27

28 **Participants:** We enrolled 20 stage I-IIIa lung cancer survivors who completed curative intent  
29 therapy in the prior one to six months.  
30  
31  
32

33 **Results:** Participants viewed telemedicine as convenient, however impersonal and  
34 technologically challenging, with most reporting low self-efficacy in their ability to use  
35 technology. Most reported little to no knowledge of the potential benefits of specific exercise  
36 training regimens, including those directed towards reducing dyspnea, fatigue, or falls. If they  
37 were to design their own telerehabilitation program, participants had a predominant preference  
38 for live and one-on-one interaction with a therapist, to enhance therapeutic relationship and  
39 ensure correct learning of the training techniques. Most participants had trouble stating their  
40 explicit health goals, with many having questions or concerns about their lung cancer status.  
41 Some wanted better control of symptoms and functional challenges or engage in healthful  
42 behaviors.  
43  
44  
45  
46  
47  
48  
49  
50  
51  
52  
53  
54  
55  
56  
57  
58  
59  
60

1  
2  
3 **Conclusions:** Features of telerehabilitation interventions for lung cancer survivors following  
4 curative intent therapy may need to include strategies to improve self-efficacy and skills with  
5 telemedicine. Education to improve knowledge of the benefits of rehabilitation and exercise  
6 training, with alignment to patient formulated goals, may increase uptake. Lung cancer survivors  
7 preferred exercise training with live and one-on-one therapist interaction, which may enhance  
8 learning, adherence, and completion. Future work should determine how to incorporate these  
9 features into telerehabilitation programs.  
10  
11  
12  
13  
14  
15  
16  
17  
18  
19  
20  
21  
22

### 23 **Strengths and limitations of this study**

- 24
- 25
- 26
- 27 • A contemporary sample of lung cancer survivors within six months of curative intent
- 28 therapy.
- 29
- 30
- 31 • Use of the Social Cognitive Theory to guide study design, analysis, and
- 32 interpretation, enhancing transferability.
- 33
- 34
- 35 • In-depth illustrations of participants' views, with almost all of participants having had
- 36 experience with telemedicine, enhancing credibility.
- 37
- 38
- 39 • Absence of subgroup comparisons to better understand health goals and fear about
- 40 lung cancer status.
- 41
- 42
- 43
- 44 • Feasibility and acceptability of telerehabilitation intervention not evaluated.
- 45
- 46
- 47
- 48
- 49
- 50
- 51
- 52
- 53
- 54
- 55
- 56
- 57
- 58
- 59
- 60

1  
2  
3 *Text*  
4  
5

## 6 **INTRODUCTION**

7

8 Lung cancer is the second-most frequently diagnosed cancer in the United States (U.S.)<sup>1</sup> and  
9 the world.<sup>2</sup> In the U.S., forty to 50% of lung cancers are diagnosed at stage I-IIIa,<sup>3,4</sup> most of  
10 which are eligible for curative intent therapy through a combination of surgery, definitive  
11 radiation, and/or concurrent chemoradiation, with or without neo-/adjuvant therapy.<sup>5,6</sup> The  
12 number of lung cancer survivors eligible for curative intent therapy is expected to increase  
13 alongside efforts to improve lung cancer screening uptake<sup>7</sup> to reduce lung cancer mortality,<sup>8</sup> and  
14 additional advances in diagnostic<sup>9,10</sup> and therapeutic modalities<sup>11-15</sup> to improve lung cancer  
15 survival rates beyond those significantly-made in the past two decades.<sup>16</sup> Following curative  
16 intent therapy, many survivors (i.e., anyone living with or beyond a lung cancer diagnosis)  
17 experience significant symptom burden,<sup>17</sup> impairments in physical and psychological function,<sup>18</sup>  
18 disability,<sup>19</sup> and poor health-related quality of life.<sup>20</sup> As such, approaches are needed to improve  
19 these survivorship outcomes.<sup>21</sup>  
20  
21  
22  
23  
24  
25  
26  
27  
28  
29  
30  
31  
32  
33

34 Exercise training and rehabilitation for lung cancer survivors following surgical treatment  
35 increase exercise capacity and may improve physical function and symptom control.<sup>22,23</sup>  
36 However, there is a need for home-based interventions, particularly with personalization,<sup>23</sup> to  
37 increase uptake, adherence, and completion. Telerehabilitation is an emergent model to  
38 increase uptake and completion of rehabilitation services.<sup>24</sup> Little is known about lung cancer  
39 survivors' views on telerehabilitation following curative intent therapy to personalize  
40 interventions and better meet their needs.  
41  
42  
43  
44  
45  
46  
47  
48  
49

50 Therefore, we conducted this formative qualitative study to gain in-depth understanding  
51 of lung cancer survivors' views on telerehabilitation following curative intent therapy. Our  
52 research questions were: What are lung cancer survivors' 1) attitudes and perceived self-  
53  
54  
55  
56  
57  
58  
59  
60



1  
2  
3 efficacy towards telemedicine; 2) knowledge of the benefits of rehabilitation and exercise  
4 training; 3) perceived facilitators and preferences towards telerehabilitation; and 4) health goals  
5 following curative intent therapy.  
6  
7  
8  
9

## 10 11 12 13 **METHODS**

14  
15  
16 **Context & Sampling:** Between April and October 2022, we recruited lung cancer survivors who  
17 received care at the Rocky Mountain Regional Veterans Affairs Medical Center (RMR VAMC).  
18 The RMR VAMC is a hub site for the Lung Precision Oncology Program, providing lung cancer  
19 care for U.S. veterans from Eastern and Western Colorado, Wyoming, and Montana. We  
20 obtained verbal informed consent from all participants. We estimated that 20 participants would  
21 be needed to identify salient themes to answer our research questions. The Colorado Multiple  
22 Institutional Review Board approved this study (21-4701). We followed the Standards for  
23 Reporting Qualitative Research recommendations<sup>25</sup> to report this study.  
24  
25  
26  
27  
28  
29  
30  
31

32  
33 We recruited patients from: 1) pulmonary nodule conference and clinic; 2) scheduled  
34 bronchoscopies for suspected or diagnosed lung cancer; 3) thoracic surgery clinic; and 4) multi-  
35 disciplinary tumor board. We enrolled veterans with stage I-IIIa lung cancer who completed the  
36 primary mode of curative intent therapy (i.e., surgical resection, definitive radiation, or  
37 concurrent chemoradiation) in the prior one to six months. We excluded patients with severe  
38 cardiopulmonary disease (i.e., heart failure with reduced ejection fraction < 25% or any  
39 condition requiring > 6 liters/minute of supplemental oxygen), any neurologic (e.g., dementia) or  
40 psychiatric disorders (e.g., psychosis) precluding informed consent, or with an estimated life  
41 expectancy < six months.  
42  
43  
44  
45  
46  
47  
48  
49  
50  
51  
52  
53  
54  
55  
56  
57  
58  
59  
60

1  
2  
3 **Researcher Characteristic:** Three researchers (DMH, MAN, RPK) conducted semi-structured  
4 interviews, coding, and data analysis. No researcher self-identified as a lung cancer survivor,  
5 veteran, or as having strong views on telemedicine.  
6  
7  
8

9  
10 **Qualitative Approach:** We used a formative qualitative research approach<sup>26,27</sup> to explore lung  
11 cancer survivors' views prior to conducting a telerehabilitation intervention, guided by the Social  
12 Cognitive Theory (SCT).<sup>28</sup> The SCT postulates that knowledge of health risks and benefits  
13 initiates the process of possible behavior change, with behavior influenced by 1) perceived self-  
14 efficacy, 2) facilitators and impediments, 3) outcome expectations, and 4) goals (E-Figure 1).<sup>28</sup>  
15  
16 The SCT has been applied to increase physical activity among cancer survivors<sup>29</sup> with moderate  
17 and sustained effects.<sup>30</sup> We adapted the SCT (with modifications in parentheses) to gain in-  
18 depth understanding of lung cancer survivors' 1) (attitudes and) perceived self-efficacy towards  
19 telemedicine; 2) (knowledge of accurate) outcome expectations (e.g., benefits) of rehabilitation  
20 and exercise training; 3) perceived facilitators (and preferences) towards telerehabilitation; and  
21 4) health goals following curative intent therapy (E-Figure 1).  
22  
23  
24  
25  
26  
27  
28  
29  
30  
31  
32  
33

34 **Data Collection & Processing:** We developed interview questions guided by the SCT, with  
35 additional questions on posttreatment experience, sociodemographic characteristics, home  
36 internet access, and patient-reported measures on health literacy and frailty (E-Table 1). We  
37 conducted and audio-recorded semi-structured interviews using Microsoft Teams® (Microsoft  
38 Corporation). We transcribed interviews verbatim, sixteen of which were with institutionally-  
39 approved professional transcription services, and four with Microsoft Teams® transcription.  
40  
41 Following each interview, we used a debrief guide (E-Table 2) to reflect and document feelings  
42 on how the interviews went, what was heard, and potential codes.  
43  
44  
45  
46  
47  
48  
49  
50

51 **Data Analysis:** We used directed content<sup>31</sup> and primarily deductive<sup>32</sup> qualitative data analysis  
52 guided by the SCT. We developed codes *a priori* based on our research and interview  
53 questions, along with a list of operational definitions of terminologies to guide analysis and  
54  
55  
56  
57  
58  
59  
60

1  
2  
3 interpretation, including to distinguish “telerehabilitation” (i.e., the delivery of therapeutic  
4 rehabilitation at a distance or offsite using telecommunications technologies) from  
5 “telemedicine” (i.e., the delivery of health services via remote telecommunications) (E-Table 3).  
6  
7 We first conducted team-based coding, with all three researchers coding the same transcript.  
8  
9 After discussion of this transcript, we agreed on codes and thereafter, conducted individual  
10 coding. We merged all coded transcripts and queried transcripts using codes mapped to our  
11 interview guide and research questions. To identify themes,<sup>33</sup> we reviewed codes across and  
12 within transcripts, conducted weekly team meetings to discuss and obtain consensus, and  
13 identify illustrative quotes reflective of themes. We additionally used a cancer survivorship care  
14 framework (on cancer recurrence, physical and psychosocial effects of cancer and treatment,  
15 chronic conditions, and health promotion and disease prevention)<sup>34</sup> to consolidate findings on  
16 health goals. For analyses, we used ATLAS.ti-22 (ATLAS.ti GmbH).  
17  
18  
19  
20  
21  
22  
23  
24  
25  
26  
27  
28

29 After analysis of 20 transcripts, we assessed thematic saturation,<sup>35</sup> and with a base size  
30 of four themes (centered around SCT constructs) and run length of two (potential) additional  
31 interviews, we decided there was a very low probability of acquiring new meaningful information,  
32 particularly with themes defined as prevalent among half of participants.<sup>33</sup>  
33  
34  
35  
36  
37

38 **Patient and Public Involvement:** This study involved semi-structured interviews with patients,  
39 but neither the patients nor the public were involved in the design, conduct, reporting, or  
40 dissemination plans of this research.  
41  
42  
43  
44  
45  
46  
47

## 48 RESULTS

49  
50 We identified 31 stage I-IIIa lung cancer survivors, excluded two (due to patient preference of  
51 not undergoing lung cancer treatment), with five patients unable to be reached within the  
52 eligibility period; three declined enrollment due to hearing difficulties, and another reported  
53  
54  
55  
56  
57  
58  
59  
60

1  
2  
3 competing priorities. Among 20 participants enrolled (Table 1), 85% had prior experience with  
4 telemedicine. The median interview duration was 37 (range 19-46) minutes. We identified four  
5 salient themes to describe lung cancer survivors' views on telerehabilitation following curative  
6 intent therapy: 1) telemedicine is convenient, however impersonal and technologically  
7 challenging, with most perceiving low self-efficacy towards telemedicine; 2) limited knowledge of  
8 the benefits of rehabilitation and exercise training; 3) live therapist interaction as a facilitator and  
9 a predominant preference for one-on-one over group telerehabilitation; and 4) somewhat poorly  
10 formulated and no predominant health goals following curative intent therapy, with common  
11 questions and concerns about lung cancer status.  
12  
13  
14  
15  
16  
17  
18  
19  
20  
21  
22  
23  
24

25  
26 **1) Telemedicine is convenient (Table 2A), however impersonal (Table 2B) and**  
27 **technologically challenging (Table 2C), with most reporting low perceived self-efficacy**  
28 **towards telemedicine.**  
29  
30

31  
32 Many participants viewed telemedicine as convenient, less time consuming, and easier to  
33 access: "I actually think [my doctor and I] accomplish more in a small[er] amount of time  
34 because of the fact I didn't have to drive [to the medical center], wait until...my turn, then get in  
35 [the medical office] and tell the doctor everything [was] alright. I enjoy [telemedicine]...I think it's  
36 great" (Participant-18). Others viewed telemedicine as a solution to overcome distance barriers:  
37 "[I think telemedicine] is a great way [to receive health care]. It saves...time, gas, and travel  
38 expenses [...]" (Participant-7). However, many participants also voiced concerns about the  
39 impersonality of remote care, preferring live and in-person contact to develop a therapeutic  
40 relationship: "I don't like [telemedicine]...[when] people talk to me, I want to see their eyes. I  
41 want to hear...from them [in person], not out of the television screen" (Participant-6). Some  
42 were reluctant to receive care remotely: "I'm...old-fashioned. I like person-to-person [visits] with  
43 a doctor [...]" (Participant-2). Most participants voiced concerns about their ability to use  
44  
45  
46  
47  
48  
49  
50  
51  
52  
53  
54  
55  
56  
57  
58  
59  
60

1  
2  
3 technology to access health care, with several reporting being not 'tech savvy': "I...got this  
4 smartphone...about two years ago. I'm still trying to figure out how to use [it], and setting up that  
5 video connect (software platform for telemedicine visits at RMR VAMC) call...I didn't have a  
6 clue how to do that" (Participant-7); and others simply not wanting to use telemedicine: "I'd  
7 rather do it (receive care) in person. I'm not very technical" (Participant-15).  
8  
9  
10  
11  
12

13  
14  
15  
16  
17 **2) Limited knowledge of potential benefits of rehabilitation and exercise training (Table**  
18 **3A).**  
19

20  
21  
22 Most participants reported no knowledge of the types of exercises or how they could improve  
23 health following lung cancer treatment: "I have no knowledge at all" (Participant-3). There was  
24 also limited knowledge of exercise training regimens to address specific symptoms or  
25 impairments: "I wasn't even aware that there was an exercise you could do to deal with  
26 [shortness of breath]" (Participant-7); and "I don't know much about [the specific types of  
27 exercises] that would help with shortness of breath, fatigue, or falls" (Participant-18). Among  
28 those who received lung cancer resection surgery, a few recalled their hospital discharge  
29 instructions on the importance of physical activity to prevent respiratory symptoms: "[to walk] at  
30 a good [and] calm pace...around the block [so that] phlegm [wouldn't] build up in [the] lungs'  
31 (Participant-20). Others drew from common knowledge: "[Exercise] keeps you healthy, except  
32 for cancer; it doesn't do anything to alleviate cancer" (Participant-17); or, when asked about  
33 reasons why they engaged in exercise – the benefits they experienced: "[I exercise] for state of  
34 mind" (Participant-4), "to maintain what I have" (Participant-15); or their beliefs about it: "If I...  
35 don't move around...eventually I'm [going to] die...[sitting] on the couch" (Participant-7).  
36  
37  
38  
39  
40  
41  
42  
43  
44  
45  
46  
47  
48  
49  
50

51  
52 Moreover, most participants viewed rehabilitation as primarily to improve physical health,  
53 to "make [one's] body better" (Participant-11), or "get back to...as good a shape [as] before"  
54  
55  
56  
57  
58  
59  
60

1  
2  
3 (Participant-5). Most equated the terms “rehabilitation” or “rehab” as physical, not psychological  
4 (i.e., for substance use disorder) rehabilitation. In addition, all reported neutral to positive views,  
5 with no participant raising concerns about the terms “rehabilitation” or “rehab” being negative or  
6 stigmatizing. These views were true even in the context of substance use: “[To me these terms  
7 are generally] positive...especially physically...with the drug situation, it’s a harder nut to  
8 crack...but both of them are beneficial” (Participant-17) (Table 3B).  
9  
10  
11  
12  
13  
14  
15

### 16 17 18 **3) Live interaction with a therapist as a perceived facilitator (Table 4A) and a predominant** 19 **preference for one-on-one over group-based telerehabilitation (Table 4B).** 20 21 22

23 There was a predominant preference for live and one-on-one rehabilitation, with many  
24 participants raising concerns about learning the correct training techniques: “[Telerehabilitation]  
25 takes away the hands-on...you get better understanding of what the therapist...is trying to tell  
26 you...when you...get hands-on treatment...they show you what to do” (Participant-16).  
27  
28  
29

30 Participants were open to telerehabilitation if there were live therapist interaction to ensure they  
31 were learning the correct training techniques: “I think [live interaction] is [very] important, so  
32 [that] I can find out if I am even doing [the exercises] right” (Participant-3). Participants also  
33 viewed that live interaction would help them stay motivated and accountable: “as long [as] I was  
34 being viewed [I would be willing to participate]...I wouldn’t want [a situation] where I was telling  
35 [the therapist] I was doing something, and I wasn’t. [I want] accountability” (Participant-8). In  
36 addition, live and one-on-one therapy was viewed as enhancing communication: “I would prefer  
37 one-on-one...it makes it a little easier...to communicate back and forth. If you’ve got six  
38 people...and they’re all asking different questions, it’s a little hard” (Participant-7). Another  
39 facilitator was readiness to engage in exercise training, with several participants reported being  
40 “reasonably ready” to “very ready,” particularly among those with little to no significant health  
41 issues posttreatment (Participants-2/3/7/8/9). A few were open to group-based telerehabilitation  
42  
43  
44  
45  
46  
47  
48  
49  
50  
51  
52  
53  
54  
55  
56  
57  
58  
59  
60

1  
2  
3 with therapist interaction: “Live interaction, that would be great. Either one-on-one or in a group  
4 [is fine]” (Participant-17).  
5  
6  
7  
8  
9

10  
11 **4a) Somewhat poorly formulated and no predominant health goal within 1-6 months**  
12 **following curative intent therapy, with common questions or concerns about lung cancer**  
13 **status (Table 5A).**  
14  
15

16  
17 When asked about their health goals in the next few months and beyond, most participants had  
18 trouble verbalizing their explicit health goals, with some simply stating to “stay healthy”  
19 (Participants-4/17) or “alive” (Participants-15/19), while others reporting that health goals were  
20 “not something [they]...[thought] about” (Participant-5), or that they “[had] none (health goals)”  
21 (Participant-6). A common concern participants voiced was uncertainty about their lung cancer  
22 status. Many reported being in a state of waiting for the next computed tomography (CT) scan to  
23 determine if their lung cancer were in remission: “I guess they kind of left me hanging. I don’t  
24 know if I still have [lung cancer] or if [the treatment] worked...I won’t get another CT scan until  
25 October, so I really don’t know what my situation is” (Participant-9). Some expressed fear about  
26 treatment failure:  
27  
28  
29  
30  
31  
32  
33  
34  
35  
36  
37

38  
39 ‘They’re [going to] do a CT scan on me on the first [of the month], and we’ll be able to  
40 determine then whether or not they’ve got it – the cancer beat or not. Personally, it  
41 makes me wonder if the radiation...has done any good...if I’m [going to] be terminal or  
42 are they [going to] cure this thing [...]. You’re kind of out here in no man’s land, and until  
43 we get the CT scan back...we just don’t know for sure’ (Participant-13).  
44  
45  
46  
47  
48  
49

50  
51 **4b-i) Physical and psychosocial functioning, and comorbid conditions:** While most  
52 participants lacked explicit health goals, some expressed wanting control of symptoms and  
53 functional challenges: “I would like to be able to walk better, have more energy, and breathe  
54  
55  
56  
57  
58  
59  
60

1  
2  
3 better" (Participant-3). Another participant reported wanting to have "more control over [his]  
4 breathing," to "get rid of the swelling in the feet," get back to "[doing] the things [he] enjoyed  
5 doing," and have "better [physical] stability at work" (Participant-2). Some also reported wanting  
6 to address specific conditions beyond lung cancer: "[My health goals are to] basically start  
7 working on the other things that are wrong with me, like managing the COPD (chronic  
8 obstructive pulmonary disease) better" (Participant-18). One participant reported sequential  
9 goals: "I'd like to get a clean bill of health on my cancer for one...and then get my knee taken  
10 care of (replaced), and [then] I can get out and exercise" (Participant-16) (Table 5B-i).

11  
12  
13  
14  
15  
16  
17  
18  
19  
20  
21 **(4b-ii) Health promotion and disease prevention:** Some participants spoke about maintaining  
22 an active lifestyle: "Three days a week...I go over to the YMCA and play pickleball [...]. I think  
23 it's important...to keep exercising" (Participant-1). Others spoke about positive changes: "I'd like  
24 to be able to quit smoking. I'd like to be more [physically] active than I am" (Participant-9); or  
25 "see if I can [quit smoking] and lose some weight" (Participant-15). Some also reported having  
26 survived lung cancer as a reason for change: "Because I had lung cancer...I feel like I need the  
27 exercise more" (Participant-13), and with another participant, to return to previous behavior:  
28 "this [lung cancer]...has kind of forced me to go back to using the bicycle four or five times a  
29 week" (Participant-11). One participant wanted to reduce substance use: "I'm trying to cut down  
30 on the alcohol use" (Participant-7); and another, improve sleep: "I need to work on my sleep  
31 habits [...]. I get up [in the morning] and I go back to sleep" (Participant-8) (Table 5B-ii).

## 32 33 34 35 36 37 38 39 40 41 42 43 44 45 46 47 **DISCUSSION**

48  
49  
50 In this study, we found that lung cancer survivors perceived telemedicine as convenient,  
51 however impersonal and technologically challenging, with most reporting low self-efficacy in  
52 their ability to use technology to access health care. Almost all had little to no knowledge of the  
53  
54  
55  
56  
57  
58  
59  
60



1  
2  
3 potential benefits of specific exercise training regimens to reduce dyspnea, fatigue, or falls. If  
4 they were able to design their own telerehabilitation program, participants strongly preferred live  
5 and one-on-one interaction with a therapist to enhance therapeutic relationship and ensure  
6 correct learning of the exercise training regimens. Participants were often unable to formulate  
7 health goals, with many having questions or concerns about their lung cancer status. These  
8 findings have important implications in the design of telerehabilitation interventions to improve  
9 the physical and psychological function of lung cancer survivors following curative intent  
10 therapy.  
11  
12  
13  
14  
15  
16  
17  
18  
19

20  
21 The contrasting views on telemedicine we identified are similar to a previous meta-  
22 synthesis of qualitative studies, in which adult cancer survivors identified the convenience and  
23 burden of telemedicine interventions.<sup>36</sup> Similar to our findings, a meta-synthesis reported that  
24 while telemedicine enabled survivors to feel more connected with clinicians, many also  
25 perceived it as impersonal.<sup>36</sup> These contrasting views have been described in systematic  
26 reviews involving patients with COPD,<sup>37</sup> cardiovascular disease,<sup>38</sup> and care across different  
27 healthcare settings,<sup>39</sup> and may reflect subgroup or individual perspectives, or differences in  
28 context (e.g., telemedicine modality, purpose).  
29  
30  
31  
32  
33  
34  
35  
36  
37

38  
39 There is paucity of knowledge on lung cancer survivors' views on telemedicine to deliver  
40 rehabilitation services (i.e., telerehabilitation) following curative intent therapy. One study with  
41 lung cancer survivors within two years of surgical resection found that approximately half were  
42 willing to use a prototype, web-based exercise program, with higher perceived acceptance of a  
43 mobile-based symptom and activity monitoring system.<sup>40</sup> Another study of stage I-IIIa lung  
44 cancer survivors' perspectives on a prototype mindfulness-based mobile application identified  
45 convenience and potential health benefits as attractive features, with concerns also raised about  
46 technological challenges and absence of live therapist interaction.<sup>41</sup> The predominant  
47 preference for live and one-on-one telerehabilitation we identified contrasts with previous  
48  
49  
50  
51  
52  
53  
54  
55  
56  
57  
58  
59  
60

1  
2  
3 studies reporting varied preferences on physical activity programming,<sup>42-45</sup> possibly due to the  
4 telerehabilitation context, shorter time since treatment completion, patient cultural, and/or  
5 organizational characteristics. The importance of supervision by an exercise or physiotherapy  
6 professional for training has been reported, albeit not in the telerehabilitation context<sup>42,43,46</sup> or  
7 exclusively involving lung cancer survivors.<sup>47</sup>  
8  
9  
10  
11  
12

13  
14 Lung cancer survivors in our study also had limited knowledge regarding the role of  
15 exercise training regimens to address specific symptom or functional challenges, including  
16 shortness of breath, fatigue, or falls, all of which are highly-prevalent and important to stage I-III  
17 survivors.<sup>48</sup> Moreover, most patients equated rehabilitation as a strategy to improve physical,  
18 not psychological function. This view is in contrast with the definition and intention of “pulmonary  
19 rehabilitation” – “a comprehensive intervention...designed to improve the physical and  
20 psychological condition of people with chronic lung disease...”<sup>49</sup> – and could reflect low  
21 accessibility or utilization of pulmonary rehabilitation services. In addition, patients in our study  
22 had no concern about the terms “rehabilitation” or “rehab” being negative or stigmatizing. These  
23 positive-to-neutral views are in contrast to a prior editorial<sup>50</sup> reporting that patients with COPD  
24 voiced concerns about “rehab,” due to common media stories of popular television personalities  
25 undergoing treatment for substance use disorders. These findings have important implications  
26 on the proper messaging related to rehabilitation services.  
27  
28  
29  
30  
31  
32  
33  
34  
35  
36  
37  
38  
39  
40  
41

42 Many survivors in our study had questions or concerns about their lung cancer status,  
43 with some understandably fearing treatment failure. Fear of cancer recurrence – common  
44 among cancer survivors<sup>51</sup> including among those without comorbid psychiatric disorders<sup>52</sup> – has  
45 been associated with lower engagement in healthful behaviors,<sup>53</sup> higher physical and  
46 psychological impairment,<sup>54</sup> and increased healthcare utilization.<sup>55</sup> These findings suggest that,  
47 following curative intent therapy and prior to the guideline-recommended, six-month interval,  
48 surveillant chest CT,<sup>21</sup> strategies to manage worry or fear of treatment failure or cancer  
49  
50  
51  
52  
53  
54  
55  
56  
57  
58  
59  
60

1  
2  
3 recurrence<sup>56</sup> may also be needed. Such strategy could be delivered concurrently or  
4  
5 sequentially,<sup>57</sup> depending on patient needs,<sup>58</sup> to arrive at multi-targeted rehabilitation.<sup>59</sup>  
6  
7

8         The perceived low self-efficacy towards telemedicine suggests that hybrid strategies of  
9  
10 remotely-delivered and in-person rehabilitation may be needed to enhance therapeutic  
11  
12 relationships and ensure delivery of essential components (i.e., exercise training, education,  
13  
14 and behavioral support).<sup>24,49</sup> Education could enhance knowledge or learning about the potential  
15  
16 benefits of exercise training regimens on impairments (e.g., inspiratory muscle training to  
17  
18 alleviate dyspnea)<sup>60</sup> and self-management skills.<sup>61</sup> Behavior change support may incorporate  
19  
20 techniques that align with the SCT (e.g., formulate goals).<sup>30</sup> Psychological interventions to  
21  
22 reduce worry or fear may also be beneficial.  
23  
24  
25  
26  
27

## 28 **Strengths and limitations**

29

30  
31 Strengths of our study include trustworthiness: we developed codes *a priori* and used multiple  
32  
33 interviewers and coders (enhancing dependability); provided in-depth illustrations of  
34  
35 participants' views, with almost all of participants having had experience with telemedicine  
36  
37 (credibility); and adapted the SCT to guide study design, analysis, and interpretation  
38  
39 (transferability). Additional strengths include a real-world and contemporary sample of lung  
40  
41 cancer survivors within six months of curative intent therapy, providing valuable insights into this  
42  
43 unique patient population at an often-overlooked period, with implications to improve  
44  
45 downstream survivorship outcomes.  
46  
47

48         Our study is limited by the absence of subgroup comparisons (e.g., by age, upstream  
49  
50 time from possible to diagnosed lung cancer, prior life-threatening diagnoses including another  
51  
52 cancer), with limited time elapsed posttreatment, precluding definitive conclusions on worry or  
53  
54 fear. In addition, we did not use other theoretical frameworks nor conduct longitudinal  
55  
56  
57  
58  
59  
60

1  
2  
3 interviews, which may be important to inform intervention design. Further, we included  
4  
5 participants from a single U.S. Veterans Affairs Medical Center, most of whom were male, with  
6  
7 significant cigarette smoking, and comorbid COPD, limiting transferability. Last, we do not know  
8  
9 the feasibility or acceptability of a telerehabilitation intervention in this population.  
10

## 11 12 13 14 15 **CONCLUSION**

16  
17  
18 Features of telerehabilitation interventions for lung cancer survivors following curative intent  
19  
20 therapy may need to include strategies to improve self-efficacy and skills in telemedicine.

21  
22 Education to improve knowledge of potential benefits of rehabilitation and exercise training may  
23  
24 increase uptake. Exercise training with live therapist interaction, to target specific symptoms,  
25  
26 physical and psychological impairments, and/or facilitate comorbidity control, with alignment to  
27  
28 patient formulated goals, may enhance learning, adherence, and completion. Future work  
29  
30 should determine how to incorporate these features into telerehabilitation programs.  
31  
32  
33  
34  
35  
36  
37  
38  
39  
40  
41  
42  
43  
44  
45  
46  
47  
48  
49  
50  
51  
52  
53  
54  
55  
56  
57  
58  
59  
60

### Author Contributions

DMH, MAN, RPK, and LMH contributed substantially to the study design, data analysis and interpretation, writing, and/or final approval of the manuscript. DBB, MLN, SKR, JES-L, JLS, AVP, and RLK contributed substantially to the study design, interpretation, writing, and/or final approval of the manuscript.

### Competing interest

All authors declare that no competing interest exists.

### Funding

This work was directly supported by Career Development Award (1IK2RX003661, PI Ha) from the United States (U.S.) Department of Veterans Affairs, Rehabilitation Research and Development Service. Dr Ha is also supported by the American Lung Association Lung Cancer Discovery Award (820773). The views expressed in this article are those of the authors and do not necessarily reflect the position or policy of the Department of Veterans Affairs, the U.S. government, or the American Lung Association. The following authors were employed (job title) at the Rocky Mountain Regional Veterans Affairs Medical Center, Aurora, Colorado: DMH, DBB, MLN, SKR (Staff Physician/Surgeon); RLK (Associate Chief of Staff, Research Service); MAN and RPK (Health Sciences Specialist); LMH (Health Research Scientist); and JES-L (GRECC Researcher). DMH, LMH, DBB, MLN, SKR, JSL, JES-L, AVP, and RLK also hold academic appointments at the University of Colorado School of Medicine.

### Data Availability Statement

Not applicable – this study is not a clinical trial and does not meet requirements for data sharing per *Tier 2* journal policy.

### Abbreviations

COPD = chronic obstructive pulmonary disease; CT = computed tomography; FEV<sub>1</sub> = forced expiratory volume in one second; FVC = forced vital capacity; OSA = obstructive sleep apnea; SBRT = stereotactic body radiotherapy; RMR VAMC = Rocky Mountain Regional Veterans Affairs Medical Center; SCT = Social Cognitive Theory; SD = standard deviation

## Tables

Table 1: Participant Characteristics

| Characteristic (N=20)                                           | Value      |
|-----------------------------------------------------------------|------------|
| Age, years, mean (SD)                                           | 71.2 (5.5) |
| Age ≥ 65 years, %                                               | 80         |
| Male sex, %                                                     | 90         |
| White, non-Hispanic, %                                          | 95         |
| Married marital status, %                                       | 65         |
| College education or higher, %                                  | 65         |
| Employed status, %                                              | 10         |
| Marginal or limited health literacy (BRIEF scale), %            | 40         |
| Frail status (FRAIL scale), %                                   | 40         |
| Home access to internet, %                                      | 85         |
| Rural living environment <sup>*</sup> , %                       | 25         |
| Prior experience with telemedicine <sup>†</sup> , %             | 85         |
| Smoking status, %                                               |            |
| Current                                                         | 45         |
| Former                                                          | 55         |
| Comorbidities, %                                                |            |
| COPD <sup>‡</sup>                                               | 90         |
| Oxygen therapy (1-6 liters/minute)                              | 40         |
| OSA                                                             | 25         |
| Psychiatric illness <sup>§</sup>                                | 40         |
| Lung cancer characteristics, %                                  |            |
| Screen-detected                                                 | 35         |
| Adenocarcinoma <sup>  </sup> /squamous/small-cell/presumed      | 60/25/5/10 |
| Collaborative stage IA/IIA/IIIA                                 | 75/10/15   |
| Curative intent therapy modality, %                             |            |
| Surgical resection <sup>¶</sup>                                 | 40         |
| SBRT                                                            | 40         |
| Chemoradiation                                                  | 20         |
| Time since primary treatment completion, months, median (range) | 2 (1-6)    |

<sup>\*</sup>Defined by the Veterans Health Administration Office of Rural Health (i.e., areas with < 30% of the population residing in an urbanized area) using zip code of residence.

<sup>†</sup>Via telephone or video visits.

<sup>‡</sup>Defined as post-bronchodilator FEV<sub>1</sub>/FVC < 70%.

<sup>§</sup>Defined as clinically diagnosed depression, anxiety, post-traumatic stress disorder, bipolar, or schizophrenia.

<sup>||</sup>Including 1 case of adeno-squamous carcinoma.

<sup>¶</sup>Of which 6 were lobectomies and 2 sub-lobar (1 segmentectomy; 1 wedge) resections.

COPD = chronic obstructive pulmonary disease; FEV<sub>1</sub> = forced expiratory volume in one second; FVC = forced vital capacity; OSA = obstructive sleep apnea; SBRT = stereotactic body radiotherapy; SD = standard deviation

Table 2: Attitudes and Perceived Self-Efficacy Towards Telemedicine

| Illustrative Quotes                                                                                                                                                                                                                                                                         | Participant ID |
|---------------------------------------------------------------------------------------------------------------------------------------------------------------------------------------------------------------------------------------------------------------------------------------------|----------------|
| <b>(A) Telemedicine is convenient</b>                                                                                                                                                                                                                                                       |                |
| "It's nice to have a [telemedicine visit], talk about things and not have to worry about showing up somewhere... 100-and-some miles away. I think [telemedicine is very] darn convenient."                                                                                                  | Participant 7  |
| "I think [telemedicine] is a good idea. Some people... come in-person to see an actual physician, but if they can see [the physician] on the phone, talk to [him or her remotely], I think it works out great."                                                                             | Participant 2  |
| "Some appointments... have to be physical, but unless [the doctor's] physical presence is required, I'm going to, as much as possible, work on video appointments."                                                                                                                         | Participant 12 |
| "I think [telemedicine] is a great idea... it keeps everybody safer [because] people aren't driving to the hospital sick... to go in for a meeting [with a clinician]."                                                                                                                     | Participant 18 |
| "I think [telemedicine] would be a lot more convenient, rather than having to go to a building [for in-person visits]."                                                                                                                                                                     | Participant 13 |
| <b>(B) Telemedicine is impersonal</b>                                                                                                                                                                                                                                                       |                |
| "Depending on the [health] issues... you have to [be in person] to see what's going on. You can't listen to breathing over [the] internet [or] phone... I'd rather have a one-to-one in-person appointment."                                                                                | Participant 2  |
| "I like the face-to-face [visits]. When it comes to issues like what I have, I want face-to-face [visits]. I want to feel comfortable with who I'm talking to... [telemedicine] is too cold and sterile."                                                                                   | Participant 17 |
| "[I've had experience with telemedicine (video and telephone)], and I think that the video takes away [the hands-on interaction]. In-person visits [are] better."                                                                                                                           | Participant 16 |
| "I'd rather go physically [for my appointments] and have them talk to my face."                                                                                                                                                                                                             | Participant 20 |
| "I've talked to my heart doctor now and again about changing my medicine [over the phone]. But that's about it [regarding my experience with telemedicine]. Otherwise, I go to the VA [physically for my appointments]. I'm very happy with the VA. I'd rather [have my visits] in-person." | Participant 15 |
| "[I am hesitant to use telemedicine]. I like the one-on-one health experiences."                                                                                                                                                                                                            | Participant 10 |
| <b>(C) Telemedicine is technologically challenging</b>                                                                                                                                                                                                                                      |                |
| "[I've had experience with remote care] a couple of times... with video, and as far as the technology, I had a [heck] of a time with it. I had to actually go into the VA and have the nurse show me how to do it because I'm not really [technical]."                                      | Participant 7  |
| "[I've received care remotely], via video... [but at times needed] to use the telephone. I'm just not computer literate [...]. I did get a tablet from the VA [for remote care]... but now I don't know my password. I forgot it."                                                          | Participant 3  |
| "[I've not received remote care via video because] I'm not too computer savvy."                                                                                                                                                                                                             | Participant 9  |



|                                                                                                                                                                                                                                                                                                                                                             |                                                                                                                                                                                                                                                                                                                                                                                                                                                                                                                                                                                                                                                                                                                          |                                                                                       |
|-------------------------------------------------------------------------------------------------------------------------------------------------------------------------------------------------------------------------------------------------------------------------------------------------------------------------------------------------------------|--------------------------------------------------------------------------------------------------------------------------------------------------------------------------------------------------------------------------------------------------------------------------------------------------------------------------------------------------------------------------------------------------------------------------------------------------------------------------------------------------------------------------------------------------------------------------------------------------------------------------------------------------------------------------------------------------------------------------|---------------------------------------------------------------------------------------|
| 1<br>2<br>3<br>4<br>5<br>6<br>7<br>8<br>9<br>10<br>11<br>12<br>13<br>14<br>15<br>16<br>17<br>18<br>19<br>20<br>21<br>22<br>23<br>24<br>25<br>26<br>27<br>28<br>29<br>30<br>31<br>32<br>33<br>34<br>35<br>36<br>37<br>38<br>39<br>40<br>41<br>42<br>43<br>44<br>45<br>46<br>47<br>48<br>49<br>50<br>51<br>52<br>53<br>54<br>55<br>56<br>57<br>58<br>59<br>60 | <p>“My computer skills are limited...I would have to have hands-on teaching [to have video visits].”</p> <p>“[I anticipate that with video visits, I would have] my standard problems (with the software) and beat[ing] my head against the wall trying to get it going, but I’ll get it going if I need to.”</p> <p>“I don’t know how to use the computers. I’m challenged with the computer ...[I would be more comfortable with video visits if] somebody [could] walk [me] through it, like over the phone.”</p> <p>“[I’ve received care remotely], over the phone...I’m probably not as versed as most people [with video visits]. [For video visits,] I [would] get my daughter over here and help me, maybe.”</p> | <p>Participant 8</p> <p>Participant 11</p> <p>Participant 5</p> <p>Participant 10</p> |
|-------------------------------------------------------------------------------------------------------------------------------------------------------------------------------------------------------------------------------------------------------------------------------------------------------------------------------------------------------------|--------------------------------------------------------------------------------------------------------------------------------------------------------------------------------------------------------------------------------------------------------------------------------------------------------------------------------------------------------------------------------------------------------------------------------------------------------------------------------------------------------------------------------------------------------------------------------------------------------------------------------------------------------------------------------------------------------------------------|---------------------------------------------------------------------------------------|

Table 3: Knowledge of Benefits of Rehabilitation and Exercise Training

| Illustrative Quotes                                                                                                                                                                                                                                                      | Participant ID |
|--------------------------------------------------------------------------------------------------------------------------------------------------------------------------------------------------------------------------------------------------------------------------|----------------|
| <b>(A) Limited knowledge of benefits of rehabilitation/exercise training</b>                                                                                                                                                                                             |                |
| “You’re talking in strange territory there [about the types of exercises or how to do them]. I’ve had no instructions whatsoever...other than the spirometer. About breathing exercises or any of that stuff, I just haven’t had any [instructions].”                    | Participant 1  |
| “I really don’t have any [understanding of the types of exercises and how they can or cannot help with my health].”                                                                                                                                                      | Participant 9  |
| “The only [type of exercise] I can think of is cardio [...]. Rehab [for me has to] have something to exercise the lungs [...]. If there were exercises that would help me with my falls, yeah [I’d also be interested to learn]; I’ve got scars all over my face.”       | Participant 17 |
| “I really learned to exercise in the Army. I don’t use them all, but I exercise once in a while.”                                                                                                                                                                        | Participant 6  |
| <b>(B) Neutral-to-positive views on rehabilitation</b>                                                                                                                                                                                                                   |                |
| “I think [of rehabilitation as] a physical therapy thing, not getting over being a drunk [or substance use disorder]...for me, [rehabilitation is] to keep my body working the way it’s supposed to be working.”                                                         | Participant 1  |
| “[Rehabilitation or exercise would help] quite a bit [with my health]. I would feel better. Anytime I exercise it helps me feel better.”                                                                                                                                 | Participant 3  |
| “Rehabilitation means...to get yourself better, to work yourself through something to make your life better.”                                                                                                                                                            | Participant 18 |
| “Rehab would be trying to make my lungs better and techniques to be more comfortable, and hopefully I can deal with the issues from lung cancer much better, like breath control...things that I could use if I start getting short of breath.”                          | Participant 2  |
| “My thing with rehabilitation is if you have a problem, you need to get somebody to help you solve your problem. That’s rehabilitation. I don’t care if drugs or alcohol, eating disorder, or something, all kinds of stuff out there. People need rehab, they need it.” | Participant 6  |
| “To me [rehabilitation is] extremely positive.”                                                                                                                                                                                                                          | Participant 12 |

Table 4: Perceived Facilitators and Preferences Towards Telerehabilitation

| Illustrative Quotes                                                                                                                                                                                                                          | Participant ID |
|----------------------------------------------------------------------------------------------------------------------------------------------------------------------------------------------------------------------------------------------|----------------|
| <b>(A) Live therapist interaction as a facilitator</b>                                                                                                                                                                                       |                |
| “[It is] absolutely important [to have live interaction with a therapist [...]. By having [live interaction with] a PT person, [the therapy is] more specifically tailored for me....”                                                       | Participant 12 |
| “[Having live interaction with a therapist is] very important to make sure if I’m doing things the right way, [particularly] if there’s some kind of technique or twisting or bending motion.”                                               | Participant 2  |
| “[Telerehabilitation] would be fine as long as they could view me while the session was going on...I think it would be very important to [to have live interaction with a therapist].”                                                       | Participant 8  |
| “[Having live interaction with a therapist is] the ideal for me.”                                                                                                                                                                            | Participant 6  |
| “If there is not an instructor or something, I probably wouldn’t do it.”                                                                                                                                                                     | Participant 3  |
| <b>(B) Predominant preference for one-on-one over group telerehabilitation</b>                                                                                                                                                               |                |
| “I prefer one-on-one’s. I’ve always been that way...I’m kind of shy in front of big groups...I don’t like being around a lot of people...I feel like everybody is staring at me.”                                                            | Participant 18 |
| “[My ideal telerehabilitation program] would be face-to-face conference...[one-on-one] if the clinician isn’t overworked.”                                                                                                                   | Participant 11 |
| “If you had a bunch of other people [in telerehabilitation together], I’d feel kind of inadequate...I’m not tech savvy.”                                                                                                                     | Participant 13 |
| “I think having one-on-one is probably ideal, but I think you could probably get the same message, especially if it’s people that had the same surgery and they’re recovering from the same thing, then the group would probably work fine.” | Participant 5  |

Table 5: Health Goals Following Curative Intent Therapy of Lung Cancer

| Illustrative Quotes                                                                                                                                                                                                                                                                                                                                                                                                                                          | Participant ID |
|--------------------------------------------------------------------------------------------------------------------------------------------------------------------------------------------------------------------------------------------------------------------------------------------------------------------------------------------------------------------------------------------------------------------------------------------------------------|----------------|
| <b>(A) Common questions or concerns about lung cancer status</b>                                                                                                                                                                                                                                                                                                                                                                                             |                |
| "I'm thinking about [recovering]. I'm [going to] find out...in a couple of weeks whether or not this [radiation treatment] did any good."                                                                                                                                                                                                                                                                                                                    | Participant 7  |
| "I haven't seen anybody since my treatment. I don't have an appointment... until the 23 <sup>rd</sup> of September...when I go in...to do another CT scan to see if they got all of the cancer [...]. Then on the 27 <sup>th</sup> or 29 <sup>th</sup> (of September) [my oncologist] will go ahead and give me the results of the CT scan and let me know, 'hey, it's all gone', or 'hey, there's still something there' or what we're [going to] do next." | Participant 18 |
| "The only concern I have [is about] the lung cancer coming back."                                                                                                                                                                                                                                                                                                                                                                                            | Participant 17 |
| "I'm kind of in a limbo until I know [about my lung cancer status]. And once I know one way or another, what the deal is, I'll remain in limbo. After I find out for sure what's happening [with my lung cancer status], then I can be more [purposeful] as far as what my aspirations are."                                                                                                                                                                 | Participant 13 |
| "Well, naturally, [my goal is] to improve. Hopefully the radiation...has done its job and taken care of it – the lung cancer that I had, the spot wasn't that big."                                                                                                                                                                                                                                                                                          | Participant 4  |
| "I'm basically doing pretty good right now [...]. I just won't know [about my lung cancer status] until July."                                                                                                                                                                                                                                                                                                                                               | Participant 6  |
| <b>(B-i) Physical and psychosocial functioning, comorbidity control</b>                                                                                                                                                                                                                                                                                                                                                                                      |                |
| "I'd like to have better balance [with walking]."                                                                                                                                                                                                                                                                                                                                                                                                            | Participant 8  |
| "I'd like to improve my mobility [...]. I'm [also] hoping to relieve some pain [...]. I walk about 15 minutes and...I'm spent."                                                                                                                                                                                                                                                                                                                              | Participant 10 |
| "[My goal is to be] able to get around without breathing hard."                                                                                                                                                                                                                                                                                                                                                                                              | Participant 14 |
| "Hopefully the neuropathy will dissipate, and I can go back to doing my needlework (art craft)."                                                                                                                                                                                                                                                                                                                                                             | Participant 2  |
| "I'm getting TMS (transcranial magnetic stimulation, an approach to treat anxiety and depression) so I want to finish that."                                                                                                                                                                                                                                                                                                                                 | Participant 3  |
| "I have arthritis; I try to walk one mile every morning."                                                                                                                                                                                                                                                                                                                                                                                                    | Participant 15 |
| <b>(B-ii) Health promotion and disease prevention</b>                                                                                                                                                                                                                                                                                                                                                                                                        |                |
| "My health goals are to stay healthy [...]. I'm 64 years old, and because I've taken care of myself and [have] had plenty of exercise, I'm still pretty healthy."                                                                                                                                                                                                                                                                                            | Participant 17 |
| "I'd like to get out a little bit more [...]. I like going to the park but I get a little bit apprehensive to get out and walk too long."                                                                                                                                                                                                                                                                                                                    | Participant 20 |
| "I'm a smoker, so I'm trying to quit. That's my big goal."                                                                                                                                                                                                                                                                                                                                                                                                   | Participant 15 |
| "[My goal is to try] to quit smoking."                                                                                                                                                                                                                                                                                                                                                                                                                       | Participant 4  |

## References

1. Siegel RL, Miller KD, Wagle NS, Jemal A. Cancer statistics, 2023. *CA Cancer J Clin* 2023;73(1):17-48. (In eng). DOI: 10.3322/caac.21763.
2. Sung H, Ferlay J, Siegel RL, et al. Global Cancer Statistics 2020: GLOBOCAN Estimates of Incidence and Mortality Worldwide for 36 Cancers in 185 Countries. *CA: a cancer journal for clinicians* 2021;71(3):209-249. (In eng). DOI: 10.3322/caac.21660 [doi].
3. Gould MK, Munoz-Plaza CE, Hahn EE, Lee JS, Parry C, Shen E. Comorbidity Profiles and Their Effect on Treatment Selection and Survival among Patients with Lung Cancer. *Annals of the American Thoracic Society* 2017;14(10):1571-1580. (In eng). DOI: 10.1513/AnnalsATS.201701-030OC [doi].
4. Ha DM, Zeng C, Chan ED, et al. Association of Exercise Behavior with Overall Survival in Stage I-III A Lung Cancer. *Annals of the American Thoracic Society* 2020 (In eng). DOI: 10.1513/AnnalsATS.202003-235OC [doi].
5. McDonald F, De Waele M, Hendriks LE, Faivre-Finn C, Dingemans AC, Van Schil PE. Management of stage I and II nonsmall cell lung cancer. *Eur Respir J* 2017;49(1) (In eng). DOI: 10.1183/13993003.00764-2016.
6. Daly ME, Singh N, Ismaila N, et al. Management of Stage III Non-Small-Cell Lung Cancer: ASCO Guideline. *J Clin Oncol* 2022;40(12):1356-1384. (In eng). DOI: 10.1200/jco.21.02528.
7. State of Lung Cancer - 2022 Report. American Lung Association (<https://www.lung.org/getmedia/381ca407-a4e9-4069-b24b-195811f29a00/SOLC-2020->).
8. National Lung Screening Trial Research T, Aberle DR, Adams AM, et al. Reduced lung-cancer mortality with low-dose computed tomographic screening. *The New England journal of medicine* 2011;365(5):395-409. (In eng). DOI: 10.1056/NEJMoa1102873.
9. Silvestri GA, Vachani A, Whitney D, et al. A Bronchial Genomic Classifier for the Diagnostic Evaluation of Lung Cancer. *N Engl J Med* 2015;373(3):243-51. (In eng). DOI: 10.1056/NEJMoa1504601.
10. Hattori A, Hirayama S, Matsunaga T, et al. Distinct Clinicopathologic Characteristics and Prognosis Based on the Presence of Ground Glass Opacity Component in Clinical Stage IA Lung Adenocarcinoma. *J Thorac Oncol* 2019;14(2):265-275. (In eng). DOI: 10.1016/j.jtho.2018.09.026.
11. Antonia SJ, Villegas A, Daniel D, et al. Overall Survival with Durvalumab after Chemoradiotherapy in Stage III NSCLC. *The New England journal of medicine* 2018;379(24):2342-2350. (In eng). DOI: 10.1056/NEJMoa1809697 [doi].
12. Wu YL, Tsuboi M, He J, et al. Osimertinib in Resected EGFR-Mutated Non-Small-Cell Lung Cancer. *The New England journal of medicine* 2020 (In eng). DOI: 10.1056/NEJMoa2027071 [doi].
13. Saji H, Okada M, Tsuboi M, et al. Segmentectomy versus lobectomy in small-sized peripheral non-small-cell lung cancer (JCOG0802/WJOG4607L): a multicentre, open-label, phase 3, randomised, controlled, non-inferiority trial. *Lancet* 2022;399(10335):1607-1617. (In eng). DOI: 10.1016/s0140-6736(21)02333-3.
14. Jänne PA, Riely GJ, Gadgeel SM, et al. Adagrasib in Non-Small-Cell Lung Cancer Harboring a KRAS(G12C) Mutation. *N Engl J Med* 2022;387(2):120-131. (In eng). DOI: 10.1056/NEJMoa2204619.
15. Forde PM, Spicer J, Lu S, et al. Neoadjuvant Nivolumab plus Chemotherapy in Resectable Lung Cancer. *N Engl J Med* 2022;386(21):1973-1985. (In eng). DOI: 10.1056/NEJMoa2202170.
16. Siegel RL, Miller KD, Fuchs HE, Jemal A. Cancer Statistics, 2021. *CA: a cancer journal for clinicians* 2021;71(1):7-33. (In eng). DOI: 10.3322/caac.21654 [doi].

17. Wang Q, Stone K, Kern JA, et al. Adverse Events Following Limited Resection versus Stereotactic Body Radiation Therapy for Early-Stage Lung Cancer. *Ann Am Thorac Soc* 2022 (In eng). DOI: 10.1513/AnnalsATS.202203-275OC.
18. Nugent SM, Golden SE, Hooker ER, et al. Longitudinal Health-related Quality of Life among Individuals Considering Treatment for Stage I Non-Small-Cell Lung Cancer. *Annals of the American Thoracic Society* 2020;17(8):988-997. (In eng). DOI: 10.1513/AnnalsATS.202001-029OC [doi].
19. Global Burden of Disease Cancer C, Fitzmaurice C, Abate D, et al. Global, Regional, and National Cancer Incidence, Mortality, Years of Life Lost, Years Lived With Disability, and Disability-Adjusted Life-Years for 29 Cancer Groups, 1990 to 2017: A Systematic Analysis for the Global Burden of Disease Study. *JAMA oncology* 2019;5(12):1749-1768. (In eng). DOI: 10.1001/jamaoncol.2019.2996 [doi].
20. Joshy G, Thandrayen J, Koczwara B, et al. Disability, psychological distress and quality of life in relation to cancer diagnosis and cancer type: population-based Australian study of 22,505 cancer survivors and 244,000 people without cancer. *BMC medicine* 2020;18(1):372-020-01830-4. (In eng). DOI: 10.1186/s12916-020-01830-4 [doi].
21. Colt HG, Murgu SD, Korst RJ, Slatore CG, Unger M, Quadrelli S. Follow-up and surveillance of the patient with lung cancer after curative-intent therapy: Diagnosis and management of lung cancer, 3rd ed: American College of Chest Physicians evidence-based clinical practice guidelines. *Chest* 2013;143(5 Suppl):e437S-54S. (In eng). DOI: 10.1378/chest.12-2365; 10.1378/chest.12-2365.
22. Cavalheri V, Burtin C, Formico VR, et al. Exercise training undertaken by people within 12 months of lung resection for non-small cell lung cancer. *The Cochrane database of systematic reviews* 2019;6:CD009955. (In eng). DOI: 10.1002/14651858.CD009955.pub3 [doi].
23. Driessen EJ, Peeters ME, Bongers BC, et al. Effects of prehabilitation and rehabilitation including a home-based component on physical fitness, adherence, treatment tolerance, and recovery in patients with non-small cell lung cancer: A systematic review. *Critical reviews in oncology/hematology* 2017;114:63-76. (In eng). DOI: S1040-8428(16)30363-8 [pii].
24. Holland AE, Cox NS, Houchen-Wolloff L, et al. Defining Modern Pulmonary Rehabilitation. An Official American Thoracic Society Workshop Report. *Annals of the American Thoracic Society* 2021;18(5):e12-e29. (In eng). DOI: 10.1513/AnnalsATS.202102-146ST [doi].
25. O'Brien BC, Harris IB, Beckman TJ, Reed DA, Cook DA. Standards for reporting qualitative research: a synthesis of recommendations. *Acad Med* 2014;89(9):1245-51. (In eng). DOI: 10.1097/acm.0000000000000388.
26. Tolley EEU, P.R.; Mack, N.; Robinson, E.T.; Succop S.M. *Designing the Study. Qualitative Methods in Public Health - A Field Guide for Applied Research*. Second ed. San Francisco, California: John Wiley & Sons; 2016.
27. Hollin IL, Craig BM, Coast J, et al. Reporting Formative Qualitative Research to Support the Development of Quantitative Preference Study Protocols and Corresponding Survey Instruments: Guidelines for Authors and Reviewers. *Patient* 2020;13(1):121-136. (In eng). DOI: 10.1007/s40271-019-00401-x.
28. Bandura A. Health promotion by social cognitive means. *Health education & behavior : the official publication of the Society for Public Health Education* 2004;31(2):143-164. (In eng). DOI: 10.1177/1090198104263660 [doi].
29. Stacey FG, James EL, Chapman K, Courneya KS, Lubans DR. A systematic review and meta-analysis of social cognitive theory-based physical activity and/or nutrition behavior change interventions for cancer survivors. *Journal of cancer survivorship : research and practice* 2015;9(2):305-338. (In eng). DOI: 10.1007/s11764-014-0413-z [doi].



- 1  
2  
3 30. Turner RR, Steed L, Quirk H, et al. Interventions for promoting habitual exercise in people living  
4 with and beyond cancer. *The Cochrane database of systematic reviews* 2018;9:CD010192. (In  
5 eng). DOI: 10.1002/14651858.CD010192.pub3 [doi].
- 6 31. Hsieh HF, Shannon SE. Three approaches to qualitative content analysis. *Qualitative health*  
7 *research* 2005;15(9):1277-1288. (In eng). DOI: 15/9/1277 [pii].
- 8 32. Raskind IG, Shelton RC, Comeau DL, Cooper HLF, Griffith DM, Kegler MC. A Review of Qualitative  
9 Data Analysis Practices in Health Education and Health Behavior Research. *Health Educ Behav*  
10 2019;46(1):32-39. (In eng). DOI: 10.1177/1090198118795019.
- 11 33. Braun V, Clarke V. Using thematic analysis in psychology. *Qualitative Research in Psychology*  
12 2006;3(2):77-101. DOI: 10.1191/1478088706qp063oa.
- 13 34. Nekhlyudov L, Mollica MA, Jacobsen PB, Mayer DK, Shulman LN, Geiger AM. Developing a  
14 Quality of Cancer Survivorship Care Framework: Implications for Clinical Care, Research, and  
15 Policy. *Journal of the National Cancer Institute* 2019;111(11):1120-1130. (In eng). DOI:  
16 10.1093/jnci/djz089 [doi].
- 17 35. Guest G, Namey E, Chen M. A simple method to assess and report thematic saturation in  
18 qualitative research. *PLoS one* 2020;15(5):e0232076. (In eng). DOI:  
19 10.1371/journal.pone.0232076 [doi].
- 20 36. Cox A, Lucas G, Marcu A, et al. Cancer Survivors' Experience With Telehealth: A Systematic  
21 Review and Thematic Synthesis. *J Med Internet Res* 2017;19(1):e11. (In eng). DOI:  
22 10.2196/jmir.6575.
- 23 37. Brunton L, Bower P, Sanders C. The Contradictions of Telehealth User Experience in Chronic  
24 Obstructive Pulmonary Disease (COPD): A Qualitative Meta-Synthesis. *PLoS One*  
25 2015;10(10):e0139561. (In eng). DOI: 10.1371/journal.pone.0139561.
- 26 38. Al-Naher A, Downing J, Scott KA, Pirmohamed M. Factors Affecting Patient and Physician  
27 Engagement in Remote Health Care for Heart Failure: Systematic Review. *JMIR Cardio*  
28 2022;6(1):e33366. (In eng). DOI: 10.2196/33366.
- 29 39. Leonardsen AL, Hardeland C, Helgesen AK, Grøndahl VA. Patient experiences with technology  
30 enabled care across healthcare settings- a systematic review. *BMC Health Serv Res*  
31 2020;20(1):779. (In eng). DOI: 10.1186/s12913-020-05633-4.
- 32 40. Timmerman JG, Tönis TM, Dekker-van Weering MG, et al. Co-creation of an ICT-supported  
33 cancer rehabilitation application for resected lung cancer survivors: design and evaluation. *BMC*  
34 *Health Serv Res* 2016;16:155. (In eng). DOI: 10.1186/s12913-016-1385-7.
- 35 41. Beer JM, Smith KN, Kennedy T, et al. A Focus Group Evaluation of Breathe Easier: A Mindfulness-  
36 Based mHealth App for Survivors of Lung Cancer and Their Family Members. *Am J Health*  
37 *Promot* 2020;34(7):770-778. (In eng). DOI: 10.1177/0890117120924176.
- 38 42. Granger CL, Connolly B, Denehy L, et al. Understanding factors influencing physical activity and  
39 exercise in lung cancer: a systematic review. *Supportive care in cancer : official journal of the*  
40 *Multinational Association of Supportive Care in Cancer* 2017;25(3):983-999. (In eng). DOI:  
41 10.1007/s00520-016-3484-8 [doi].
- 42 43. Leach HJ, Devonish JA, Bebb DG, Krenz KA, Culos-Reed SN. Exercise preferences, levels and  
43 quality of life in lung cancer survivors. *Supportive care in cancer : official journal of the*  
44 *Multinational Association of Supportive Care in Cancer* 2015;23(11):3239-3247. (In eng). DOI:  
45 10.1007/s00520-015-2717-6 [doi].
- 46 44. Philip EJ, Coups EJ, Feinstein MB, Park BJ, Wilson DJ, Ostroff JS. Physical activity preferences of  
47 early-stage lung cancer survivors. *Supportive care in cancer : official journal of the Multinational*  
48 *Association of Supportive Care in Cancer* 2014;22(2):495-502. (In eng). DOI: 10.1007/s00520-  
49 013-2002-5 [doi].
- 50  
51  
52  
53  
54  
55  
56  
57  
58  
59  
60

- 1
- 2
- 3
- 4 45. Lin YY, Lai YF, Lu HI, Lai YL, Lin CC. Physical activity preferences among patients with lung cancer
- 5 in Taiwan. *Cancer nursing* 2013;36(2):155-162. (In eng). DOI: 10.1097/NCC.0b013e31825f4db1
- 6 [doi].
- 7 46. Granger CL, Parry SM, Edbrooke L, et al. Improving the delivery of physical activity services in
- 8 lung cancer: A qualitative representation of the patient's perspective. *European journal of*
- 9 *cancer care* 2019;28(1):e12946. (In eng). DOI: 10.1111/ecc.12946 [doi].
- 10 47. Kuijpers W, Groen WG, Loos R, et al. An interactive portal to empower cancer survivors: a
- 11 qualitative study on user expectations. *Supportive care in cancer : official journal of the*
- 12 *Multinational Association of Supportive Care in Cancer* 2015;23(9):2535-2542. (In eng). DOI:
- 13 10.1007/s00520-015-2605-0 [doi].
- 14 48. Gralla RJ, Hollen PJ, Msaouel P, Davis BV, Petersen J. An evidence-based determination of issues
- 15 affecting quality of life and patient-reported outcomes in lung cancer: results of a survey of 660
- 16 patients. *Journal of thoracic oncology : official publication of the International Association for*
- 17 *the Study of Lung Cancer* 2014;9(9):1243-1248. (In eng). DOI: 10.1097/JTO.000000000000244
- 18 [doi].
- 19 49. Spruit MA, Singh SJ, Garvey C, et al. An official American Thoracic Society/European Respiratory
- 20 Society statement: key concepts and advances in pulmonary rehabilitation. *American journal of*
- 21 *respiratory and critical care medicine* 2013;188(8):e13-64. (In eng). DOI: 10.1164/rccm.201309-
- 22 1634ST [doi].
- 23 50. Smith SM, Partridge MR. Getting the rehabilitation message across: emerging barriers and
- 24 positive health benefits. *The European respiratory journal* 2009;34(1):2-4. (In eng). DOI:
- 25 10.1183/09031936.00025309 [doi].
- 26 51. Luigjes-Huizer YL, Tauber NM, Humphris G, et al. What is the prevalence of fear of cancer
- 27 recurrence in cancer survivors and patients? A systematic review and individual participant data
- 28 meta-analysis. *Psychooncology* 2022;31(6):879-892. (In eng). DOI: 10.1002/pon.5921.
- 29 52. Bisseling EM, Compen FR, Schellekens MPJ, Thewes B, Speckens AEM, van der Lee ML. Exploring
- 30 Fear of Cancer Recurrence in a Sample of Heterogeneous Distressed Cancer Patients with and
- 31 Without a Psychiatric Disorder. *J Clin Psychol Med Settings* 2021;28(3):419-426. (In eng). DOI:
- 32 10.1007/s10880-021-09776-2.
- 33 53. Séguin Leclair C, Lebel S, Westmaas JL. The relationship between fear of cancer recurrence and
- 34 health behaviors: A nationwide longitudinal study of cancer survivors. *Health Psychol*
- 35 2019;38(7):596-605. (In eng). DOI: 10.1037/hea0000754.
- 36 54. Simard S, Thewes B, Humphris G, et al. Fear of cancer recurrence in adult cancer survivors: a
- 37 systematic review of quantitative studies. *J Cancer Surviv* 2013;7(3):300-22. (In eng). DOI:
- 38 10.1007/s11764-013-0272-z.
- 39 55. Lebel S, Tomei C, Feldstain A, Beattie S, McCallum M. Does fear of cancer recurrence predict
- 40 cancer survivors' health care use? *Support Care Cancer* 2013;21(3):901-6. (In eng). DOI:
- 41 10.1007/s00520-012-1685-3.
- 42 56. Butow PN, Turner J, Gilchrist J, et al. Randomized Trial of ConquerFear: A Novel, Theoretically
- 43 Based Psychosocial Intervention for Fear of Cancer Recurrence. *Journal of clinical oncology :*
- 44 *official journal of the American Society of Clinical Oncology* 2017;35(36):4066-4077. (In eng).
- 45 DOI: 10.1200/JCO.2017.73.1257 [doi].
- 46 57. Bade BC, Faiz SA, Ha DM, et al. Cancer-Related Fatigue in Lung Cancer: A Research Agenda. An
- 47 Official American Thoracic Society Research Statement. *American journal of respiratory and*
- 48 *critical care medicine* 2023 (in press).
- 49 58. Alfano CM, Leach CR, Smith TG, et al. Equitably improving outcomes for cancer survivors and
- 50 supporting caregivers: A blueprint for care delivery, research, education, and policy. *CA: a*
- 51 *cancer journal for clinicians* 2019;69(1):35-49. (In eng). DOI: 10.3322/caac.21548 [doi].
- 52
- 53
- 54
- 55
- 56
- 57
- 58
- 59



- 1  
2  
3 59. Spruit MA, Wouters EFM. Organizational aspects of pulmonary rehabilitation in chronic  
4 respiratory diseases. *Respirology* (Carlton, Vic) 2019;24(9):838-843. (In eng). DOI:  
5 10.1111/resp.13512 [doi].  
6  
7 60. Ammous O, Feki W, Lotfi T, et al. Inspiratory muscle training, with or without concomitant  
8 pulmonary rehabilitation, for chronic obstructive pulmonary disease (COPD). *Cochrane Database*  
9 *Syst Rev* 2023;1(1):Cd013778. (In eng). DOI: 10.1002/14651858.CD013778.pub2.  
10  
11 61. Blackstock FC, Lareau SC, Nici L, et al. Chronic Obstructive Pulmonary Disease Education in  
12 Pulmonary Rehabilitation. An Official American Thoracic Society/Thoracic Society of Australia  
13 and New Zealand/Canadian Thoracic Society/British Thoracic Society Workshop Report. *Annals*  
14 *of the American Thoracic Society* 2018;15(7):769-784. (In eng). DOI: 10.1513/AnnalsATS.201804-  
15 253WS [doi].  
16  
17  
18  
19  
20  
21  
22  
23  
24  
25  
26  
27  
28  
29  
30  
31  
32  
33  
34  
35  
36  
37  
38  
39  
40  
41  
42  
43  
44  
45  
46  
47  
48  
49  
50  
51  
52  
53  
54  
55  
56  
57  
58  
59  
60

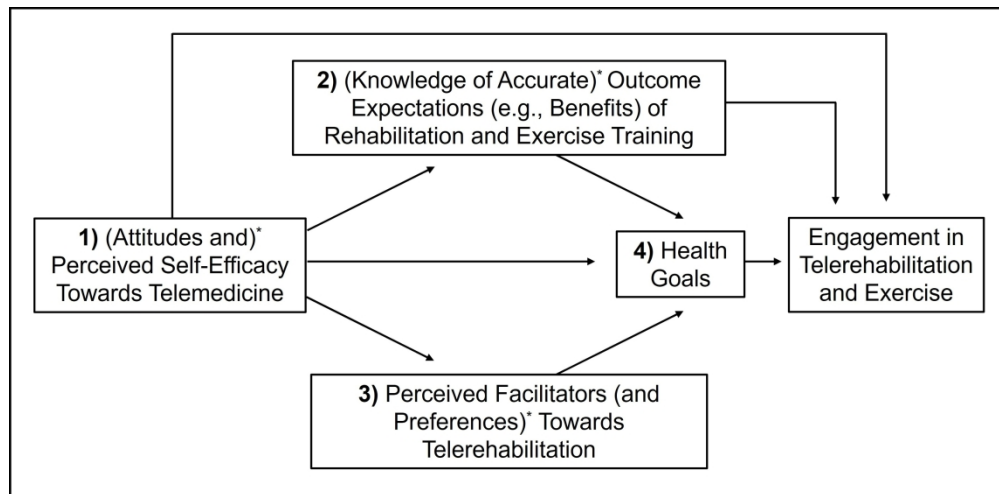

273x134mm (300 x 300 DPI)

1  
2  
3 **Lung Cancer Survivors' Views on Telerehabilitation Following Curative Intent Therapy: A**  
4  
5 **Formative Qualitative Study**  
6  
7  
8  
9

10 Duc M. Ha, MD, MAS; Mary A. Nunnery, MPH, CCRC; Robert P. Klocko, MA; Leah M.  
11 Haverhals, PhD, MA; David B. Bekelman, MD, MPH; Melissa L. New, MD; Simran K.  
12 Randhawa, MBBS; Jennifer E. Stevens-Lapsley, PT, PhD; Jamie L. Studts, PhD; Allan V.  
13 Prochazka, MD, MSc; Robert L. Keith, MD  
14  
15  
16  
17  
18  
19  
20  
21  
22  
23  
24  
25  
26  
27  
28  
29  
30  
31  
32  
33  
34  
35  
36  
37  
38  
39  
40  
41  
42  
43  
44  
45  
46  
47  
48  
49  
50  
51  
52  
53  
54  
55  
56  
57  
58  
59  
60

ONLINE SUPPLEMENT

1  
2  
3 E-Figure 1: The Social Cognitive Theory<sup>1</sup> Adapted to Inform Telerehabilitation  
4  
5  
6  
7

8 *\*Additional constructs or modifications to the SCT that could influence engagement in*  
9 *telerehabilitation and exercise.*  
10  
11  
12  
13  
14  
15  
16  
17  
18  
19  
20  
21  
22  
23  
24  
25  
26  
27  
28  
29  
30  
31  
32  
33  
34  
35  
36  
37  
38  
39  
40  
41  
42  
43  
44  
45  
46  
47  
48  
49  
50  
51  
52  
53  
54  
55  
56  
57  
58  
59  
60

1  
2  
3 **E-Table 1: Semi-structured Interview Questions Guided by the Social Cognitive Theory<sup>1</sup>**  
4

5 Thank you for taking your time to help us with these questions. In this interview, we will ask you  
6 about your health goals, knowledge on exercise and rehabilitation, and views on technology.  
7 We will also ask you about your level of health literacy, frailty, and basic demographics. These  
8 interviews typically take about 30-45 minutes. We will use the results to help design an ideal  
9 telerehabilitation program for Veterans who recently completed lung cancer treatment.  
10

11 (*Opening question*) To begin, we will start with a broad question – When were you diagnosed  
12 with lung cancer?  
13

14 What treatment did you receive? (surgery, chemo, radiation, etc.)  
15

16 When did you complete the treatment? (1-6 months ago)  
17

18 **How has your experience been** following lung cancer treatment?  
19

20 Have there been any new diagnosis or any new medical issues/concerns following your  
21 treatment?  
22

23 What **health issues** (new symptoms, new limitations to daily activities/daily life; shortness of  
24 breath, poor sleep, or fatigue, neuropathy) have you had to deal with since completing lung  
25 cancer treatment? [possible probes: Can you tell me more about...; Can you describe...more?]  
26

27 How have symptoms impacted your day-to-day activities, hobbies, or ability to complete  
28 tasks?  
29

30 Have you had any falls since completing your treatment (related or non-related to  
31 treatment)?  
32

33 What concerns you most about these health issues that you've had to deal with (since  
34 completing lung cancer treatment)?  
35

36 What is the most important (health) issue you think we should know about your  
37 experience following lung cancer treatment?  
38

39 Thank you for sharing your experience. Now, we will ask you a few questions about your current  
40 and future goals.  
41

42 What are your **health goals** in the next few months and beyond? [possible probes: Can you  
43 describe more about...; Can you explain...more?]  
44

45 What are your goals for the next few months to get your life activities to where you would  
46 like them to be?  
47

48 How are your (health) goals similar or different compared to before your lung cancer  
49 treatment? [possible probes: Describe...more for me; Explain...]  
50

51 How ready do you feel about taking steps to meet these goals? What are some possible  
52 challenges?  
53

54 **What else** would you like to add that you think might be important for us to know about your  
55 health since you completed lung cancer treatment.  
56

57 Thank you for sharing with us your health issues and goals. Next, we would like to understand  
58 more about your knowledge of exercise and rehabilitation.  
59

1  
2  
3 What, if any, have you been **told about exercise** after lung cancer treatment? [possible probes:  
4 Tell me more about...; Explain...]  
5

6 What is your understanding about what types of exercises there are and how they can or  
7 cannot help with your health?  
8

9 What is your understanding about how much exercise can or cannot help with symptoms  
10 we previously discussed (e.g., shortness of breath, poor sleep, or fatigue)?  
11

12 What is your understanding about what types of exercises can reduce falls? How are  
13 these important to you, if at all?

14 When clinicians use the word “rehabilitation”, what does that mean to you? [possible probes:  
15 Tell me more about...; Explain...]  
16

17 How is the **meaning of “rehabilitation”** similar or different compared to some of the  
18 health services that you may have received in the past, like physical or occupational  
19 therapy, or pulmonary or cardiac rehabilitation?  
20

21 Sometimes people think that “rehab” or “rehabilitation” is for substance use or abuse;  
22 how is the meaning of “rehabilitation” negative, positive, or neutral to you?  
23

24 How do you **feel rehabilitation and exercise** can help you achieve your health goals, if at all?  
25 [possible probes: Can you tell me more about...; Describe...]  
26

27 How are your exercise levels different, if at all, after lung cancer treatment?  
28

29 What are some reasons why you exercise or not?  
30

31 How ready do you feel to participate in rehabilitation and exercise in the next few  
32 months?  
33

34 Thank you sharing these thoughts. Part of the reason why are doing this is to help design a  
35 telerehabilitation program for Veterans who recently completed lung cancer treatment. So the  
36 next set of questions will ask you about using **technology for health care**.

37 Recently, a lot of Veterans have had experience receiving care remotely through telephone or  
38 video – where you can see a picture on your phone or computer screen. In the VA, this is called  
39 VA Video Connect, or VVC.

40 Have you received care remotely in VA? Over telephone or video? If you did not do it  
41 over video, why is that?  
42

43 How comfortable do you feel about using computers and the internet for health care  
44 services?  
45

46 What are some challenges you expect to have with video technology? What would help  
47 you feel more comfortable using it?  
48

49 How do you feel about exercise or rehabilitation services delivered remotely using video  
50 technology?  
51

52 Since our goal is to design a telerehabilitation program for Veterans with lung cancer following  
53 treatment,  
54

55 If you could design your **ideal telerehabilitation program**, what would that look like?  
56  
57  
58  
59  
60

How important is having live interaction with a therapist (and one-on-one or in group setting)? Why or why not?

How do you feel about self-help videos for exercises? How can they help or not?

The next set of questions are surveys. Unlike the previous questions, these next questions do not need detailed or lengthy answers since we can only check the answer options available on the surveys.

This first survey assesses your level of **health literacy**.<sup>2</sup>

1) How often do you have someone help you read hospital materials?

Always (1)  Often (2)  Sometimes (3)  Occasionally (4)  Never (5)

2) How often do you have problems learning about your medical condition because of difficulty understanding written information?

Always (1)  Often (2)  Sometimes (3)  Occasionally (4)  Never (5)

3) How often do you have a problem understanding what is told to you about your medical condition?

Always (1)  Often (2)  Sometimes (3)  Occasionally (4)  Never (5)

4) How confident are you filling out medical forms by yourself?

Not at all confident (1)  A little bit (2)  Somewhat (3)  Quite a bit (4)

Extremely confident (5)

This next survey assesses your level of **frailty**.<sup>3</sup>

1) How much of the time during the past 4 weeks did you feel tired?

All of the time  Most of the time  Some of the time  A little of the time  
 None of the time

2) By yourself and not using aids, do you have any difficulty walking up 10 steps without resting?

Yes  No

3) By yourself and not using aids, do you have any difficulty walking a couple of blocks (e.g., several hundred yards)?

Yes  No

4) Did a doctor ever tell you that you have these illnesses? (*check each illness*)

hypertension,  diabetes,  chronic lung disease,  heart attack,  congestive heart failure,  angina,  asthma,  arthritis,  stroke, and  kidney disease. How many?  
[Total number of illnesses, then add 1 for (lung) cancer]: \_\_\_\_\_

5) How much do you weigh? \_\_\_\_\_

6) One year ago, how much did you weigh? \_\_\_\_\_

7) Have you been admitted to the hospital in the past 3 months?  Yes  No

This last set of questions are on your basic **demographics**.

1  
2  
3 1) Are you  
4

5  Married/living with partner;  Divorced/separated;  Widowed; or  
6  Single/Never married?  
7

8 2) What is your highest level of education?

9  Some high school  Completed high school  Some college  
10  
11  Completed college  Graduate or doctorate degree  
12

13 3) What is your employment status?

14  Employed (part- or full-time)  Retired  Disabled  Unemployed  
15

16 4) Do you have access to internet at home?  Yes  No  
17

18 This completes our interview today. Thank you again your time. Please let us know if you have  
19 any questions for us?  
20  
21  
22  
23  
24  
25  
26  
27  
28  
29  
30  
31  
32  
33  
34  
35  
36  
37  
38  
39  
40  
41  
42  
43  
44  
45  
46  
47  
48  
49  
50  
51  
52  
53  
54  
55  
56  
57  
58  
59  
60



1  
2  
3 **E-Table 2: Post-Interview Debrief Guide**  
4

5 In general, how did the interview process go? (e.g., how engaged was the participant; how  
6 candid were the responses; how was your own comfort level?)

7  
8 What were the main **health issues** and **health goals** that came up?

- 9  
10 - Health Issues:  
11 - Health Goals:

12 What were participants' **knowledge** on exercise and rehabilitation?

- 13  
14 - How was their understanding on the types and roles (purpose) of exercise?  
15 - How did they view and define rehabilitation?  
16 - How did they feel about rehabilitation and exercise?

17  
18 How did participants feel about using **technology** for health care?

- 19  
20 - How did they feel about using technology to access health care?  
21 - How did they feel about using technology for rehabilitation services?  
22 - What were key program designs?

23 Did anything surprise you?

24 Did anything **new** come up?

25  
26 Should we change anything about the interview process?

27  
28 Should we change anything on the interview guide?

29  
30 Codes to consider:  
31  
32  
33  
34  
35  
36  
37  
38  
39  
40  
41  
42  
43  
44  
45  
46  
47  
48  
49  
50  
51  
52  
53  
54  
55  
56  
57  
58  
59  
60

E-Table 3: Operational Definitions of Terminologies for Data Analysis and Interpretation

| Terminology        | Definition                                                                                                                                                                                                                                                                                                                                                          |
|--------------------|---------------------------------------------------------------------------------------------------------------------------------------------------------------------------------------------------------------------------------------------------------------------------------------------------------------------------------------------------------------------|
| Exercise           | Physical activity which is usually regular and done with the intention of improving or maintaining physical fitness or health. <sup>4</sup>                                                                                                                                                                                                                         |
| Goal               | The end (or result or achievement) toward which effort is directed. <sup>5,6</sup>                                                                                                                                                                                                                                                                                  |
| Rehabilitation     | Restoration of human functions to the maximum degree possible in a person or persons suffering from disease or injury. <sup>7</sup>                                                                                                                                                                                                                                 |
| Self-efficacy      | <i>General:</i> 1) Participant's belief about his/her ability to perform actions necessary to produce a given effect <sup>8</sup> ; and 2) Participant's perception that he/she can exercise control over his/her health habits. <sup>1</sup><br><i>Specific to this study:</i> Participant's belief about his/her ability to use technology to access health care. |
| Telemedicine       | The delivery of health services via remote telecommunications. <sup>9</sup>                                                                                                                                                                                                                                                                                         |
| Telerehabilitation | The delivery of therapeutic rehabilitation at a distance or offsite using telecommunication technologies. <sup>10</sup>                                                                                                                                                                                                                                             |

### References:

1. Bandura A. Health promotion by social cognitive means. Health education & behavior : the official publication of the Society for Public Health Education 2004;31(2):143-164. (In eng). DOI: 10.1177/1090198104263660 [doi].
2. Haun J, Luther S, Dodd V, Donaldson P. Measurement variation across health literacy assessments: implications for assessment selection in research and practice. Journal of health communication 2012;17 Suppl 3:141-159. (In eng). DOI: 10.1080/10810730.2012.712615 [doi].
3. Morley JE, Malmstrom TK, Miller DK. A simple frailty questionnaire (FRAIL) predicts outcomes in middle aged African Americans. The journal of nutrition, health & aging 2012;16(7):601-608. (In eng). DOI: 10.1007/s12603-012-0084-2 [doi].
4. National Library of Medicine - Medical Subject Headings (MeSH): "Exercise". (<https://www.ncbi.nlm.nih.gov/mesh/68015444>).
5. "Goal". Merriam-Webster English Dictionary. Online: Merriam-Webster, Inc.; 2023.
6. "Goal". Collins English Dictionary Online: Harper Collins; 2012.
7. National Library of Medicine - Medical Subject Headings (MeSH): "Rehabilitation". (<https://www.ncbi.nlm.nih.gov/mesh/68012046>).
8. National Library of Medicine - Medical Subjects Headings (MeSH): "Self-efficacy". (<https://www.ncbi.nlm.nih.gov/mesh/?term=self-efficacy>).
9. National Library of Medicine - Medical Subject Headings (MesH): "Telemedicine". (<https://www.ncbi.nlm.nih.gov/mesh/?term=telemedicine>).
10. National Library of Medicine - Medical Subject Headings (MeSH): "Telerehabilitation" (<https://www.ncbi.nlm.nih.gov/mesh/?term=telerehabilitation>).

## Standards for Reporting Qualitative Research (SRQR) Checklist

| No. | Topic                                                                                     | Item                                                                                                                                               |
|-----|-------------------------------------------------------------------------------------------|----------------------------------------------------------------------------------------------------------------------------------------------------|
| S1  | Title                                                                                     | We provided a concise description of the nature and topic of the study identifying the study as qualitative research.                              |
| S2  | Abstract                                                                                  | We provided a summary of key elements of the study using the abstract format of the intended publication.                                          |
| S3  | Problem formulation                                                                       | We provided a description and significant of the problem studied in the Introduction.                                                              |
| S4  | Purpose and research question                                                             | We described the purpose of the study and specific research questions in the Introduction.                                                         |
| S5  | Qualitative approach and research paradigm                                                | We described the qualitative research approach (i.e., informative) and guiding theory (Social Cognitive Theory).                                   |
| S6  | Researcher characteristics and reflexivity                                                | We provided a description of the researcher characteristics.                                                                                       |
| S7  | Context                                                                                   | We described the setting/site and salient contextual factors.                                                                                      |
| S8  | Sampling strategy                                                                         | We provided description of the sampling of research participants.                                                                                  |
| S9  | Ethical issues pertaining to human subjects                                               | We provided documentation of the approval of the appropriate ethics review board and participant consent.                                          |
| S10 | Data collection methods                                                                   | We provided description of types of data collection including dates of analysis.                                                                   |
| S11 | Data collection instruments and technologies                                              | We provided description of the interview guide and technology used for recording.                                                                  |
| S12 | Units of study                                                                            | We provided the number and relevant characteristics of the participants.                                                                           |
| S13 | Data processing                                                                           | We provided descriptions of methods of processing data prior to analysis including transcription and coding.                                       |
| S14 | Data analysis                                                                             | We described in detail the process by which themes were identified.                                                                                |
| S15 | Techniques to enhance trustworthiness                                                     | We provided descriptions of techniques that enhanced the trustworthiness of study findings.                                                        |
| S16 | Synthesis and interpretation                                                              | We described the main findings of salient themes.                                                                                                  |
| S17 | Units to empirical data                                                                   | We provided evidence using illustrative quotes to substantiate analytic findings.                                                                  |
| S18 | Integration with prior work, implications, transferability, and contribution to the field | We provided detailed integration of study findings to existing literature, discussed transferability, implications, and contribution to the field. |
| S19 | Limitations                                                                               | We provided descriptions of trustworthiness and limitations of study findings.                                                                     |
| S20 | Conflicts of interest                                                                     | We provided a statement of conflict of interest.                                                                                                   |
| S21 | Funding                                                                                   | We provided description of funding.                                                                                                                |

# BMJ Open

## Lung Cancer Survivors' Views on Telerehabilitation Following Curative Intent Therapy: A Formative Qualitative Study

|                                 |                                                                                                                                                                                                                                                                                                                                                                                                                                                                                                                                                                                                                                                                                                                                                                                                                                                                                                                                                                                                                                                                                                                                               |
|---------------------------------|-----------------------------------------------------------------------------------------------------------------------------------------------------------------------------------------------------------------------------------------------------------------------------------------------------------------------------------------------------------------------------------------------------------------------------------------------------------------------------------------------------------------------------------------------------------------------------------------------------------------------------------------------------------------------------------------------------------------------------------------------------------------------------------------------------------------------------------------------------------------------------------------------------------------------------------------------------------------------------------------------------------------------------------------------------------------------------------------------------------------------------------------------|
| Journal:                        | <i>BMJ Open</i>                                                                                                                                                                                                                                                                                                                                                                                                                                                                                                                                                                                                                                                                                                                                                                                                                                                                                                                                                                                                                                                                                                                               |
| Manuscript ID                   | bmjopen-2023-073251.R1                                                                                                                                                                                                                                                                                                                                                                                                                                                                                                                                                                                                                                                                                                                                                                                                                                                                                                                                                                                                                                                                                                                        |
| Article Type:                   | Original research                                                                                                                                                                                                                                                                                                                                                                                                                                                                                                                                                                                                                                                                                                                                                                                                                                                                                                                                                                                                                                                                                                                             |
| Date Submitted by the Author:   | 16-May-2023                                                                                                                                                                                                                                                                                                                                                                                                                                                                                                                                                                                                                                                                                                                                                                                                                                                                                                                                                                                                                                                                                                                                   |
| Complete List of Authors:       | Ha, Duc; Rocky Mountain Regional VA Medical Center; University of Colorado Anschutz Medical Campus<br>Nunnery, Mary; Rocky Mountain Regional VA Medical Center<br>Klocko, Robert; Rocky Mountain Regional VA Medical Center<br>Haverhals, Leah; Rocky Mountain Regional VA Medical Center; University of Colorado Anschutz Medical Campus<br>Bekelman, David; Rocky Mountain Regional VA Medical Center; University of Colorado Anschutz Medical Campus<br>New, Melissa; Rocky Mountain Regional VA Medical Center; University of Colorado Anschutz Medical Campus<br>Randhawa, Simran; Rocky Mountain Regional VA Medical Center; University of Colorado Anschutz Medical Campus<br>Stevens-Lapsley, Jennifer; University of Colorado Denver - Anschutz Medical Campus, Physical Medicine & Rehabilitation; Rocky Mountain Regional VA Medical Center<br>Studts, Jamie; University of Colorado Cancer Center; University of Colorado Anschutz Medical Campus<br>Prochazka, Allan; University of Colorado Anschutz Medical Campus<br>Keith, Robert; Rocky Mountain Regional VA Medical Center; University of Colorado Anschutz Medical Campus |
| <b>Primary Subject Heading</b>: | Oncology                                                                                                                                                                                                                                                                                                                                                                                                                                                                                                                                                                                                                                                                                                                                                                                                                                                                                                                                                                                                                                                                                                                                      |
| Secondary Subject Heading:      | Rehabilitation medicine, Qualitative research, Patient-centred medicine, Respiratory medicine                                                                                                                                                                                                                                                                                                                                                                                                                                                                                                                                                                                                                                                                                                                                                                                                                                                                                                                                                                                                                                                 |
| Keywords:                       | Telemedicine < BIOTECHNOLOGY & BIOINFORMATICS, REHABILITATION MEDICINE, QUALITATIVE RESEARCH                                                                                                                                                                                                                                                                                                                                                                                                                                                                                                                                                                                                                                                                                                                                                                                                                                                                                                                                                                                                                                                  |
|                                 |                                                                                                                                                                                                                                                                                                                                                                                                                                                                                                                                                                                                                                                                                                                                                                                                                                                                                                                                                                                                                                                                                                                                               |

SCHOLARONE™  
Manuscripts



I, the Submitting Author has the right to grant and does grant on behalf of all authors of the Work (as defined in the below author licence), an exclusive licence and/or a non-exclusive licence for contributions from authors who are: i) UK Crown employees; ii) where BMJ has agreed a CC-BY licence shall apply, and/or iii) in accordance with the terms applicable for US Federal Government officers or employees acting as part of their official duties; on a worldwide, perpetual, irrevocable, royalty-free basis to BMJ Publishing Group Ltd ("BMJ") its licensees and where the relevant Journal is co-owned by BMJ to the co-owners of the Journal, to publish the Work in this journal and any other BMJ products and to exploit all rights, as set out in our [licence](#).

The Submitting Author accepts and understands that any supply made under these terms is made by BMJ to the Submitting Author unless you are acting as an employee on behalf of your employer or a postgraduate student of an affiliated institution which is paying any applicable article publishing charge ("APC") for Open Access articles. Where the Submitting Author wishes to make the Work available on an Open Access basis (and intends to pay the relevant APC), the terms of reuse of such Open Access shall be governed by a Creative Commons licence – details of these licences and which [Creative Commons](#) licence will apply to this Work are set out in our licence referred to above.

Other than as permitted in any relevant BMJ Author's Self Archiving Policies, I confirm this Work has not been accepted for publication elsewhere, is not being considered for publication elsewhere and does not duplicate material already published. I confirm all authors consent to publication of this Work and authorise the granting of this licence.

1  
2  
3 *Title*  
4  
5

6 Lung Cancer Survivors' Views on Telerehabilitation Following Curative Intent Therapy: A  
7  
8 Formative Qualitative Study  
9  
10  
11  
12

13 *Authors*  
14  
15

16 Duc M. Ha, MD, MAS<sup>1,2\*</sup>; Mary A. Nunnery, MPH, CCRC<sup>3</sup>; Robert P. Klocko, MA<sup>3</sup>; Leah M.  
17 Haverhals, PhD, MA<sup>3,4</sup>; David B. Bekelman, MD, MPH<sup>1,2,3</sup>; Melissa L. New, MD<sup>1,2</sup>; Simran K.  
18 Randhawa, MBBS<sup>5,6</sup>; Jennifer E. Stevens-Lapsley, PT, PhD<sup>7,8</sup>; Jamie L. Studts, PhD<sup>2,9</sup>; Allan V.  
19 Prochazka, MD, MSc<sup>2</sup>; Robert L. Keith, MD<sup>1,2</sup>  
20  
21  
22  
23  
24  
25  
26  
27

28 *Author affiliations*  
29  
30

31 <sup>1</sup>Medical and Research Service, Rocky Mountain Regional Veterans Affairs Medical Center;  
32 Aurora, Colorado  
33  
34

35 <sup>2</sup>Department of Medicine, University of Colorado Anschutz Medical Campus; Aurora, Colorado  
36  
37

38 <sup>3</sup>Denver-Seattle Center of Innovation for Veteran-Centered & Value-Driven Care, Research  
39 Service, Rocky Mountain Regional Veterans Affairs Medical Center; Aurora, Colorado  
40  
41  
42

43 <sup>4</sup>Division of Health Care Policy and Research, School of Medicine, University of Colorado  
44 Anschutz Medical Campus; Aurora, Colorado  
45  
46  
47

48 <sup>5</sup>Surgical Service, Rocky Mountain Regional Veterans Affairs Medical Center; Aurora, Colorado  
49  
50

51 <sup>6</sup>Division of Thoracic Surgery, Department of Surgery; University of Colorado Anschutz Medical  
52 Campus; Aurora, Colorado  
53  
54  
55  
56  
57  
58  
59  
60

1  
2  
3 <sup>7</sup>Department of Physical Medicine and Rehabilitation, University of Colorado Anschutz Medical  
4  
5 Campus; Aurora, Colorado

6  
7  
8 <sup>8</sup>Geriatric Research, Education, and Clinical Center, Research Service; Rocky Mountain  
9  
10 Regional Veterans Affairs Medical Center; Aurora, Colorado

11  
12  
13 <sup>9</sup>Cancer Prevention and Control, University of Colorado Cancer Center; Aurora, Colorado

14  
15  
16  
17  
18 \*Correspondence: Duc M. Ha, MD, MAS (ORCID 0000-0002-3003-9438); Section of Pulmonary  
19  
20 and Critical Care, Medical Service; Rocky Mountain Regional Veterans Affairs Medical Center;  
21  
22 1700 N Wheeling Street, F2-266 (MC-111A), Aurora, CO 80045, USA; Email: [duc.ha@va.gov](mailto:duc.ha@va.gov),  
23  
24 or [duc.ha@cuanschutz.edu](mailto:duc.ha@cuanschutz.edu)

25  
26  
27  
28  
29  
30  
31  
32  
33 *Running Head*

34  
35  
36 Lung Cancer Survivors' Views on Telerehabilitation

37  
38  
39  
40  
41  
42  
43  
44 *MeSH*

45  
46  
47 Telemedicine, survivorship, rehabilitation, exercise, veterans' health

1  
2  
3 **ABSTRACT** (300 words)  
4  
5  
6

7 **Objectives:** To inform personalized home-based rehabilitation interventions, we sought to gain  
8 in-depth understanding of lung cancer survivors' 1) attitudes and perceived self-efficacy towards  
9 telemedicine; 2) knowledge of the benefits of rehabilitation and exercise training; 3) perceived  
10 facilitators and preferences for telerehabilitation; and 4) health goals following curative intent  
11 therapy.  
12  
13  
14  
15

16  
17  
18 **Design:** We conducted semi-structured interviews guided by Bandura's Social Cognitive Theory  
19 and used directed content analysis to identify salient themes.  
20  
21  
22

23  
24 **Setting:** One U.S. Veterans Affairs Medical Center.  
25  
26  
27

28 **Participants:** We enrolled 20 stage I-IIIa lung cancer survivors who completed curative intent  
29 therapy in the prior one to six months. Eighty-five percent of participants had prior experience  
30 with telemedicine, but none with telerehabilitation or rehabilitation for lung cancer.  
31  
32  
33

34  
35 **Results:** Participants viewed telemedicine as convenient, however impersonal and  
36 technologically challenging, with most reporting low self-efficacy in their ability to use  
37 technology. Most reported little to no knowledge of the potential benefits of specific exercise  
38 training regimens, including those directed towards reducing dyspnea, fatigue, or falls. If they  
39 were to design their own telerehabilitation program, participants had a predominant preference  
40 for live and one-on-one interaction with a therapist, to enhance therapeutic relationship and  
41 ensure correct learning of the training techniques. Most participants had trouble stating their  
42 explicit health goals, with many having questions or concerns about their lung cancer status.  
43  
44  
45  
46  
47  
48  
49  
50  
51  
52  
53  
54  
55  
56  
57  
58  
59  
60  
Some wanted better control of symptoms and functional challenges or engage in healthful  
behaviors.



1  
2  
3 **Conclusions:** Features of telerehabilitation interventions for lung cancer survivors following  
4 curative intent therapy may need to include strategies to improve self-efficacy and skills with  
5 telemedicine. Education to improve knowledge of the benefits of rehabilitation and exercise  
6 training, with alignment to patient formulated goals, may increase uptake. Exercise training with  
7 live and one-on-one therapist interaction may enhance learning, adherence, and completion.  
8  
9  
10  
11  
12  
13  
14  
15  
16  
17  
18  
19  
20  
21  
22  
23  
24  
25  
26  
27  
28  
29  
30  
31  
32  
33  
34  
35  
36  
37  
38  
39  
40  
41  
42  
43  
44  
45  
46  
47  
48  
49  
50  
51  
52  
53  
54  
55  
56  
57  
58  
59  
60

Future work should determine how to incorporate these features into telerehabilitation.

### Strengths and limitations of this study

- A contemporary sample of lung cancer survivors within six months of curative intent therapy.
- Use of Bandura's Social Cognitive Theory to guide study design, analysis, and interpretation, enhancing transferability.
- In-depth illustrations of participants' views, with almost all of participants having had experience with telemedicine, enhancing credibility.
- Absence of subgroup comparisons, including by age, sex, socio-environmental factors, to better understand perceived self-efficacy, facilitators/preferences, health goals, and fear about lung cancer status.
- Feasibility and acceptability of telerehabilitation intervention not evaluated.

Text

## INTRODUCTION

Lung cancer is the second-most frequently diagnosed cancer in the United States (U.S.)<sup>1</sup> and the world.<sup>2</sup> In the U.S., forty to 50% of lung cancers are diagnosed at stage I-IIIa,<sup>3,4</sup> most of which are eligible for curative intent therapy through a combination of surgery, definitive radiation, and/or concurrent chemoradiation, with or without neo-/adjuvant therapy.<sup>5,6</sup> The number of lung cancer survivors eligible for curative intent therapy is expected to increase<sup>7</sup> alongside efforts to improve lung cancer screening uptake,<sup>8</sup> additional advances in diagnostic,<sup>9,10</sup> and therapeutic modalities.<sup>11-15</sup> Following curative intent therapy, many survivors (i.e., anyone living with or beyond a lung cancer diagnosis) experience significant symptom burden,<sup>16</sup> impairments in physical and psychological function,<sup>17</sup> disability,<sup>18</sup> and poor health-related quality of life.<sup>19</sup> As such, approaches are needed to improve these survivorship outcomes.<sup>20</sup>

Exercise training and rehabilitation for lung cancer survivors following surgical treatment increase exercise capacity and may improve physical function and symptom control.<sup>21,22</sup> However, there is a need for home-based interventions, particularly with personalization,<sup>22</sup> to increase uptake, adherence, and completion. Telerehabilitation is an emergent model to increase uptake and completion of rehabilitation services.<sup>23</sup> Telerehabilitation has also been used in cancer care to improve adherence and maintain intervention goals.<sup>24</sup> However, little is known about lung cancer survivors' views on telerehabilitation following curative intent therapy, to personalize interventions and better meet their needs.

Therefore, we conducted this formative qualitative study to gain in-depth understanding of lung cancer survivors' views on telerehabilitation following curative intent therapy. Our research questions were: What are lung cancer survivors' 1) attitudes and perceived self-

1  
2  
3 efficacy towards telemedicine; 2) knowledge of the benefits of rehabilitation and exercise  
4 training; 3) perceived facilitators and preferences towards telerehabilitation; and 4) health goals  
5 following curative intent therapy.  
6  
7  
8  
9

## 10 11 12 13 **METHODS**

14  
15  
16 **Context & Sampling:** Between April and October 2022, we recruited lung cancer survivors who  
17 received care at the Rocky Mountain Regional Veterans Affairs Medical Center (RMR VAMC).  
18 The RMR VAMC is a hub site for the Lung Precision Oncology Program, providing lung cancer  
19 care for U.S. Veterans from Eastern and Western Colorado, Wyoming, and Montana. We  
20 obtained verbal informed consent from all participants. The Colorado Multiple Institutional  
21 Review Board approved this study (21-4701). We followed the Standards for Reporting  
22 Qualitative Research recommendations<sup>25</sup> to report this study.  
23  
24  
25  
26  
27  
28  
29  
30

31 We recruited patients from: 1) pulmonary nodule conference and clinic; 2) scheduled  
32 bronchoscopies for suspected or diagnosed lung cancer; 3) thoracic surgery clinic; and 4) multi-  
33 disciplinary tumor board. We enrolled U.S. Veterans with stage I-IIIa lung cancer who  
34 completed the primary mode of curative intent therapy (i.e., surgical resection, definitive  
35 radiation, or concurrent chemoradiation) in the prior one to six months. We excluded patients  
36 with severe cardiopulmonary disease (i.e., heart failure with reduced ejection fraction < 25% or  
37 any condition requiring > 6 liters/minute of supplemental oxygen), any neurologic (e.g.,  
38 dementia) or psychiatric disorders (e.g., psychosis) precluding informed consent, or with an  
39 estimated life expectancy < six months.  
40  
41  
42  
43  
44  
45  
46  
47  
48  
49

50  
51 **Researcher Characteristic:** Three researchers (DMH, MAN, RPK) conducted semi-structured  
52 interviews, coding, and data analysis. DMH is a pulmonologist and physician investigator. MAN  
53  
54  
55  
56  
57  
58  
59  
60

1  
2  
3 and RPK are health sciences specialists with qualitative research expertise. No researcher self-  
4 identified as a lung cancer survivor, Veteran, or as having strong views on telemedicine.  
5  
6

7  
8 **Qualitative Approach:** We used a formative qualitative research approach<sup>26,27</sup> to explore lung  
9 cancer survivors' views prior to conducting a telerehabilitation intervention, guided by Bandura's  
10 Social Cognitive Theory (SCT).<sup>28</sup> The SCT postulates that knowledge of health risks and  
11 benefits initiates the process of possible behavior change, with behavior influenced by 1)  
12 perceived self-efficacy, 2) facilitators and impediments, 3) outcome expectations, and 4) goals  
13 (E-Figure 1).<sup>28</sup> The SCT has been applied to increase physical activity among cancer survivors<sup>29</sup>  
14 with moderate and sustained effects.<sup>30</sup> We adapted the SCT (with modifications in parentheses)  
15 to gain in-depth understanding of lung cancer survivors' 1) (attitudes and) perceived self-  
16 efficacy towards telemedicine; 2) (knowledge of accurate) outcome expectations (e.g., benefits)  
17 of rehabilitation and exercise training; 3) perceived facilitators (and preferences) towards  
18 telerehabilitation; and 4) health goals following curative intent therapy (E-Figure 1).  
19  
20  
21  
22  
23  
24  
25  
26  
27  
28  
29  
30

31  
32 **Data Collection & Processing:** We developed interview questions guided by the SCT, with  
33 additional questions on posttreatment experience, sociodemographic characteristics, home  
34 internet access, and patient-reported measures on health literacy and frailty (E-Table 1). We  
35 also asked about participants' views on the terms "rehabilitation" or "rehab", due to concerns for  
36 stigma associated with these terms<sup>31</sup> which may hinder uptake of rehabilitation services. We  
37 conducted and audio-recorded semi-structured interviews using Microsoft Teams® (Microsoft  
38 Corporation). We transcribed interviews verbatim, sixteen of which with institutionally-approved  
39 professional transcription services, and four with Microsoft Teams® transcription. Following each  
40 interview, we used a debrief guide (E-Table 2) to reflect and document feelings on how the  
41 interviews went, what was heard, and potential codes.  
42  
43  
44  
45  
46  
47  
48  
49  
50  
51  
52

53  
54 **Data Analysis:** We used directed content<sup>32</sup> and primarily deductive<sup>33</sup> qualitative data analysis  
55 guided by the SCT. We developed codes *a priori* based on our research and interview  
56  
57

1  
2  
3 questions, along with a list of operational definitions of terminologies to guide analysis and  
4 interpretation, including to distinguish “telerehabilitation” (i.e., the delivery of therapeutic  
5 rehabilitation at a distance or offsite using telecommunications technologies) from  
6  
7 “telemedicine” (i.e., the delivery of health services via remote telecommunications) (E-Table 3).  
8  
9 We first conducted team-based coding, with all three researchers coding the same transcript.  
10  
11 After discussion of this transcript, we agreed on codes and thereafter, conducted individual  
12 coding. We merged all coded transcripts and queried transcripts using codes mapped to our  
13 interview guide and research questions. To identify themes,<sup>34</sup> we reviewed codes across and  
14 within transcripts, conducted weekly team meetings to discuss and obtain consensus, and  
15 identify illustrative quotes reflective of themes. To consolidate findings on health goals, we  
16 additionally used a cancer survivorship care framework (on cancer recurrence, physical and  
17 psychosocial effects of cancer and treatment, chronic conditions, and health promotion and  
18 disease prevention).<sup>35</sup> For analyses, we used ATLAS.ti-22 (ATLAS.ti GmbH).  
19  
20  
21  
22  
23  
24  
25  
26  
27  
28  
29  
30

31 **Sample Size:** We estimated that 20 participants would be needed to identify salient themes to  
32 answer our four research questions (i.e., on self-efficacy, benefits, facilitators/preferences,  
33 and health goals). This estimate was based on a suggested range of 20-30 interviews for  
34 qualitative inquiry<sup>36</sup> and supported by a systematic analysis of 214 published qualitative studies  
35 in which the median sample sizes ranged 15-31 interviews.<sup>37</sup> After analysis of 20 transcripts, we  
36 assessed thematic saturation using an evidence-derived approach consisting of three primary  
37 elements – Base Size, Run Length, and New Information Threshold.<sup>38</sup> We used a Base Size of  
38 four themes (centered around the four SCT constructs), Run Length of two (potential) additional  
39 interviews, and decided there was a very low probability of acquiring New Meaningful  
40 Information, particularly with themes defined as prevalent among half of participants.<sup>34</sup>  
41  
42  
43  
44  
45  
46  
47  
48  
49  
50  
51  
52  
53  
54  
55  
56  
57  
58  
59  
60

1  
2  
3 **Patient and Public Involvement:** This study involved semi-structured interviews with patients,  
4 but neither the patients nor the public were involved in the design, conduct, reporting, or  
5 dissemination plans of this research.  
6  
7  
8  
9

## 10 11 12 13 **RESULTS**

14  
15 We identified 31 stage I-IIIa lung cancer survivors, excluded two (due to patient preference of  
16 not undergoing lung cancer treatment), with five patients unable to be reached within the  
17 eligibility period; three declined enrollment due to hearing difficulties, and another reported  
18 competing priorities. Among 20 participants enrolled (Table 1), 85% had prior experience with  
19 telemedicine; none participated in a rehabilitation or telerehabilitation program for lung cancer  
20  
21 The median (and range) interview duration was 37 (19-46) minutes.  
22  
23  
24  
25  
26  
27  
28

29 We identified four salient themes to describe lung cancer survivors' views on  
30 telerehabilitation following curative intent therapy: 1) telemedicine is convenient, however  
31 impersonal and technologically challenging, with most perceiving low self-efficacy towards  
32 telemedicine; 2) limited knowledge of the benefits of rehabilitation and exercise training; 3) live  
33 therapist interaction as a facilitator and a predominant preference for one-on-one over group  
34 telerehabilitation; and 4) somewhat poorly formulated and no predominant health goals following  
35 curative intent therapy, with common questions and concerns about lung cancer status.  
36  
37  
38  
39  
40  
41  
42  
43  
44  
45  
46

47 **1) Telemedicine is convenient (Table 2A), however impersonal (Table 2B) and**  
48 **technologically challenging (Table 2C), with most reporting low perceived self-efficacy**  
49 **towards telemedicine.**  
50  
51  
52  
53  
54  
55  
56  
57  
58  
59  
60

1  
2  
3 Many participants viewed telemedicine as convenient, less time consuming, and easier to  
4 access: “I actually think [my doctor and I] accomplish more in a small[er] amount of time  
5 because of the fact I didn’t have to drive [to the medical center], wait until...my turn, then get in  
6 [the medical office] and tell the doctor everything [was] alright. I enjoy [telemedicine]...I think it's  
7 great” (Participant 18). Others viewed telemedicine as a solution to overcome distance barriers:  
8 “[I think telemedicine] is a great way [to receive health care]. It saves...time, gas, and travel  
9 expenses [...] (Participant 7). However, many participants also voiced concerns about the  
10 impersonality of remote care, preferring live and in-person contact to develop a therapeutic  
11 relationship: “I don’t like [telemedicine]...[when] people talk to me, I want to see their eyes. I  
12 want to hear...from them [in person], not out of the television screen” (Participant 6). Some were  
13 reluctant to receive care remotely: “I’m...old-fashioned. I like person-to-person [visits] with a  
14 doctor [...]” (Participant 2). Most participants voiced concerns about their ability to use  
15 technology to access health care, with several reporting being not ‘tech savvy’: “I...got this  
16 smartphone...about two years ago. I’m still trying to figure out how to use [it], and setting up that  
17 video connect (software platform for telemedicine visits at RMR VAMC) call...I didn’t have a  
18 clue how to do that” (Participant 7); and others simply not wanting to use telemedicine: “I’d  
19 rather do it (receive care) in person. I’m not very technical” (Participant 15).  
20  
21  
22  
23  
24  
25  
26  
27  
28  
29  
30  
31  
32  
33  
34  
35  
36  
37  
38  
39  
40  
41

## 2) Limited knowledge of potential benefits of rehabilitation and exercise training (Table 3A).

42  
43  
44  
45  
46  
47 Most participants reported no knowledge of the types of exercises or how they could improve  
48 health following lung cancer treatment: “I have no knowledge at all” (Participant 3). There was  
49 also limited knowledge of exercise training regimens to address specific symptoms or  
50 impairments: “I wasn’t even aware that there was an exercise you could do to deal with  
51 [shortness of breath]” (Participant 7); and “I don’t know much about [the specific types of  
52  
53  
54  
55  
56  
57  
58  
59  
60

1  
2  
3 exercises] that would help with shortness of breath, fatigue, or falls” (Participant 18). Among  
4 those who received lung cancer resection surgery, a few recalled their hospital discharge  
5 instructions on the importance of physical activity to prevent respiratory symptoms: “[to walk] at  
6 a good [and] calm pace...around the block [so that] phlegm [wouldn’t] build up in [the] lungs’  
7 (Participant 20). Others drew from common knowledge: “[Exercise] keeps you healthy, except  
8 for cancer; it doesn’t do anything to alleviate cancer” (Participant 17); or, when asked about  
9 reasons why they engaged in exercise – the benefits they experienced: “[I exercise] for state of  
10 mind” (Participant 4), “to maintain what I have” (Participant 15); or their beliefs about it: “If I...  
11 don’t move around...eventually I’m [going to] die...[sitting] on the couch” (Participant 7).  
12  
13  
14  
15  
16  
17  
18  
19  
20  
21  
22

23 Moreover, most participants viewed rehabilitation as primarily to improve physical health,  
24 to “make [one’s] body better” (Participant 11), or “get back to...as good a shape [as] before”  
25 (Participant 5). Most equated the terms “rehabilitation” or “rehab” as physical, not psychological  
26 (i.e., for substance use disorder) rehabilitation. In addition, all reported neutral to positive views,  
27 with no participant raising concerns about the terms “rehabilitation” or “rehab” being negative or  
28 stigmatizing. These views were true even in the context of substance use: “[To me these terms  
29 are generally] positive...especially physically...with the drug situation, it’s a harder nut to  
30 crack...but both of them are beneficial” (Participant 17) (Table 3B).  
31  
32  
33  
34  
35  
36  
37  
38  
39  
40  
41

### 42 **3) Live interaction with a therapist as a perceived facilitator (Table 4A) and a predominant** 43 **preference for one-on-one over group-based telerehabilitation (Table 4B).** 44 45 46

47 There was a predominant preference for live and one-on-one rehabilitation, with many  
48 participants raising concerns about learning the correct training techniques: “[Telerehabilitation]  
49 takes away the hands-on...you get better understanding of what the therapist...is trying to tell  
50 you...when you...get hands-on treatment...they show you what to do” (Participant 16).  
51  
52  
53  
54

55 Participants were open to telerehabilitation if there were live therapist interaction to ensure they  
56  
57  
58  
59  
60



1  
2  
3 were learning the correct training techniques: “I think [live interaction] is [very] important, so  
4 [that] I can find out if I am even doing [the exercises] right” (Participant 3). Participants also  
5 viewed that live interaction would help them stay motivated and accountable: “as long [as] I was  
6 being viewed [I would be willing to participate]...I wouldn't want [a situation] where I was telling  
7 [the therapist] I was doing something, and I wasn't. [I want] accountability” (Participant 8). In  
8 addition, live and one-on-one therapy was viewed as enhancing communication: “I would prefer  
9 one-on-one...it makes it a little easier...to communicate back and forth. If you've got six  
10 people...and they're all asking different questions, it's a little hard” (Participant 7). Another  
11 facilitator was readiness to engage in exercise training, with several participants reported being  
12 “reasonably ready” to “very ready,” particularly among those with little to no significant health  
13 issues posttreatment (Participants 2, 3, 7, 8, 9). A few were open to group-based  
14 telerehabilitation with therapist interaction: “Live interaction, that would be great. Either one-on-  
15 one or in a group [is fine]” (Participant 17).

34 **4a) Somewhat poorly formulated and no predominant health goal within 1-6 months**  
35 **following curative intent therapy, with common questions or concerns about lung cancer**  
36 **status (Table 5A).**

37  
38  
39  
40  
41 When asked about their health goals in the next few months and beyond, most participants had  
42 trouble verbalizing their explicit health goals, with some simply stating to “stay healthy”  
43 (Participants 4, 17) or “alive” (Participants 15, 19), and others reporting that health goals were  
44 “not something [they]...[thought] about” (Participant 5), or that they “[had] none (health goals)”  
45 (Participant 6). A common concern participants voiced was uncertainty about their lung cancer  
46 status. Many reported being in a state of waiting for the next computed tomography (CT) scan to  
47 determine if their lung cancer were in remission: “I guess they kind of left me hanging. I don't  
48 know if I still have [lung cancer] or if [the treatment] worked...I won't get another CT scan until  
49  
50  
51  
52  
53  
54  
55  
56  
57  
58  
59  
60

1  
2  
3 October, so I really don't know what my situation is" (Participant 9). Some expressed fear about  
4  
5 treatment failure:

6  
7  
8 'They're [going to] do a CT scan on me on the first [of the month], and we'll be able to  
9  
10 determine then whether or not they've got it – the cancer beat or not. Personally, it  
11  
12 makes me wonder if the radiation...has done any good...if I'm [going to] be terminal or  
13  
14 are they [going to] cure this thing [...]. You're kind of out here in no man's land, and until  
15  
16 we get the CT scan back...we just don't know for sure' (Participant 13).  
17  
18

19 **4b-i) Physical and psychosocial functioning, and comorbid conditions:** While most  
20  
21 participants lacked explicit health goals, some expressed wanting control of symptoms and  
22  
23 functional challenges: "I would like to be able to walk better, have more energy, and breathe  
24  
25 better" (Participant 3). Another participant reported wanting to have "more control over [his]  
26  
27 breathing," to "get rid of the swelling in the feet," get back to "[doing] the things [he] enjoyed  
28  
29 doing," and have "better [physical] stability at work" (Participant 2). Some also reported wanting  
30  
31 to address specific conditions beyond lung cancer: "[My health goals are to] basically start  
32  
33 working on the other things that are wrong with me, like managing the COPD (chronic  
34  
35 obstructive pulmonary disease) better" (Participant 18). One participant reported sequential  
36  
37 goals: "I'd like to get a clean bill of health on my cancer for one...and then get my knee taken  
38  
39 care of (replaced), and [then] I can get out and exercise" (Participant 16) (Table 5B-i).  
40  
41  
42

43 **(4b-ii) Health promotion and disease prevention:** Some participants spoke about maintaining  
44  
45 an active lifestyle: "Three days a week...I go over to the YMCA and play pickleball [...]. I think  
46  
47 it's important...to keep exercising" (Participant 1). Others spoke about positive changes: "I'd like  
48  
49 to be able to quit smoking. I'd like to be more [physically] active than I am" (Participant 9); or  
50  
51 "see if I can [quit smoking] and lose some weight" (Participant 15). Some also reported having  
52  
53 survived lung cancer as a reason for change: "Because I had lung cancer...I feel like I need to  
54  
55 exercise more" (Participant 13), and with another participant, to return to previous behavior: "this  
56  
57  
58  
59  
60

1  
2  
3 [lung cancer]...has kind of forced me to go back to using the bicycle four or five times a week”  
4  
5 (Participant 11). One participant wanted to reduce substance use: “I’m trying to cut down on the  
6  
7 alcohol use” (Participant 7); and another, improve sleep: “I need to work on my sleep habits [...].  
8  
9 I get up [in the morning] and I go back to sleep” (Participant 8) (Table 5B-ii).  
10  
11  
12  
13  
14

## 15 **DISCUSSION**

16  
17 In this study, we found that lung cancer survivors perceived telemedicine as convenient,  
18  
19 however impersonal and technologically challenging, with most reporting low self-efficacy in  
20  
21 their ability to use technology to access health care. Almost all had little to no knowledge of the  
22  
23 potential benefits of specific exercise training regimens to reduce dyspnea, fatigue, or falls. If  
24  
25 they were able to design their own telerehabilitation program, participants strongly preferred live  
26  
27 and one-on-one interaction with a therapist to enhance therapeutic relationship and ensure  
28  
29 correct learning of the exercise training regimens. Participants were often unable to formulate  
30  
31 health goals, with many having questions or concerns about their lung cancer status. These  
32  
33 findings have important implications in the design of telerehabilitation interventions to improve  
34  
35 the physical and psychological function of lung cancer survivors following curative intent  
36  
37 therapy.  
38  
39  
40  
41

42 The contrasting views on telemedicine we identified are similar to a previous meta-  
43  
44 synthesis of qualitative studies, in which adult cancer survivors identified the convenience and  
45  
46 burden of telemedicine interventions.<sup>39</sup> Similar to our findings, a meta-synthesis reported that  
47  
48 while telemedicine enabled survivors to feel more connected with clinicians, many also  
49  
50 perceived it as impersonal.<sup>39</sup> These contrasting views have been described in systematic  
51  
52 reviews involving patients with COPD,<sup>40</sup> cardiovascular disease,<sup>41</sup> and care across different  
53  
54 healthcare settings,<sup>42</sup> and may reflect subgroup or individual perspectives, or differences in  
55  
56  
57  
58  
59  
60

1  
2  
3 context (e.g., telemedicine modality, purpose). The possibility of “trade-offs” between  
4  
5 convenience and impersonality of telemedicine were not explored.  
6  
7

8           There is paucity of knowledge on lung cancer survivors’ views on telemedicine to deliver  
9  
10 rehabilitation services (i.e., telerehabilitation) following curative intent therapy. One study with  
11  
12 lung cancer survivors within two years of surgical resection found that approximately half were  
13  
14 willing to use a prototype, web-based exercise program, with higher perceived acceptance of a  
15  
16 mobile-based symptom and activity monitoring system.<sup>43</sup> Another study of stage I-IIIa lung  
17  
18 cancer survivors’ perspectives on a prototype mindfulness-based mobile application identified  
19  
20 convenience and potential health benefits as attractive features, with concerns also raised about  
21  
22 technological challenges and absence of live therapist interaction.<sup>44</sup> The predominant  
23  
24 preference for live and one-on-one telerehabilitation we identified contrasts with previous  
25  
26 studies reporting varied preferences on physical activity programming,<sup>45-48</sup> possibly due to the  
27  
28 telerehabilitation context, shorter time since treatment completion, patient cultural, and/or  
29  
30 organizational characteristics. The importance of supervision by an exercise or physiotherapy  
31  
32 professional for training has been reported, albeit not in the telerehabilitation context<sup>45,46,49</sup> or  
33  
34 exclusively involving lung cancer survivors.<sup>50</sup>  
35  
36  
37

38           Lung cancer survivors in our study also had limited knowledge regarding the role of  
39  
40 exercise training regimens to address specific symptom or functional challenges, including  
41  
42 shortness of breath, fatigue, or falls, all of which are highly-prevalent and important to stage I-III  
43  
44 survivors.<sup>51</sup> Moreover, most patients equated rehabilitation as a strategy to improve physical,  
45  
46 not psychological function. This view is in contrast with the definition and intention of “pulmonary  
47  
48 rehabilitation” – “a comprehensive intervention...designed to improve the physical and  
49  
50 psychological condition of people with chronic lung disease...”<sup>52</sup> – and could reflect low  
51  
52 accessibility or utilization of pulmonary rehabilitation services. In addition, patients in our study  
53  
54 had no concern about the terms “rehabilitation” or “rehab” being negative or stigmatizing. These  
55  
56  
57  
58  
59  
60

1  
2  
3 positive-to-neutral views are in contrast to a prior editorial<sup>31</sup> reporting that patients with COPD  
4 voiced concerns about “rehab,” due to common media stories of popular television personalities  
5 undergoing treatment for substance use disorders. These findings have important implications  
6 on the messaging related to rehabilitation services.  
7  
8  
9  
10

11  
12 Many survivors in our study had questions or concerns about their lung cancer status,  
13 with some understandably fearing treatment failure. Fear of cancer recurrence – common  
14 among cancer survivors<sup>53</sup> including among those without comorbid psychiatric disorders<sup>54</sup> – has  
15 been associated with lower engagement in healthful behaviors,<sup>55</sup> higher physical and  
16 psychological impairment,<sup>56</sup> and increased healthcare utilization.<sup>57</sup> These feelings, generally not  
17 addressed in lung cancer, may also hinder patients from planning for the future or formulate  
18 health goals. Our findings suggest that, following curative intent therapy and prior to the  
19 guideline-recommended, six-month interval, surveillant chest CT,<sup>20</sup> strategies to manage worry  
20 or fear of treatment failure or cancer recurrence<sup>58</sup> may also be needed. Psychological support  
21 could enhance awareness of emotions about cancer, reduce the influence of rigid or distressing  
22 thoughts, clarify personal values, and commit to meaningful life activities,<sup>59</sup> may reduce fear and  
23 facilitate the formulation of health goals. Such strategy could be delivered concurrently or  
24 sequentially,<sup>60</sup> depending on patient physical and/or psychological needs,<sup>61</sup> to arrive at multi-  
25 targeted rehabilitation.<sup>62</sup>  
26  
27  
28  
29  
30  
31  
32  
33  
34  
35  
36  
37  
38  
39  
40  
41

42 The perceived low self-efficacy towards telemedicine suggests that hybrid strategies of  
43 remotely-delivered and in-person rehabilitation may be needed to enhance therapeutic  
44 relationships and ensure delivery of essential components (i.e., exercise training, education,  
45 and behavioral support).<sup>23,52</sup> Education could enhance knowledge or learning about the potential  
46 benefits of exercise training regimens on impairments (e.g., inspiratory muscle training to  
47 alleviate dyspnea)<sup>63</sup> and self-management skills (e.g., of comorbid cardiopulmonary disease).<sup>64</sup>  
48  
49  
50  
51  
52  
53  
54  
55  
56  
57  
58  
59  
60

1  
2  
3 Behavior change support may incorporate techniques that align with the SCT (e.g., formulate  
4 goals).<sup>30</sup> Psychological interventions to reduce worry or fear may also be beneficial.  
5  
6  
7  
8  
9

## 10 **Strengths and limitations**

11  
12  
13 Strengths of our study include trustworthiness: we developed codes *a priori* and used multiple  
14 interviewers and coders (enhancing dependability); provided in-depth illustrations of  
15 participants' views, with almost all of participants having had experience with telemedicine  
16 (credibility); and adapted the SCT to guide study design, analysis, and interpretation  
17 (transferability). Additional strengths include a real-world and contemporary sample of lung  
18 cancer survivors within six months of curative intent therapy, providing valuable insights into this  
19 unique patient population at an often-overlooked period, with implications to improve  
20 downstream survivorship outcomes.  
21  
22  
23  
24  
25  
26  
27  
28  
29  
30

31 Our study is limited by the absence of subgroup comparisons (e.g., by age, sex,  
32 upstream time from possible to diagnosed lung cancer, prior life-threatening diagnoses including  
33 another cancer), with limited time elapsed posttreatment, precluding definitive conclusions on  
34 worry or fear. In addition, we did not use other theoretical frameworks, inquire about specific  
35 socio-environmental factors, nor conduct longitudinal interviews, which may be important to  
36 inform intervention design. Further, we included participants from a single U.S. Veterans Affairs  
37 Medical Center, most of whom were male, with significant cigarette smoking, and comorbid  
38 COPD, limiting transferability. Women's perspectives could reveal important health-related  
39 attitudes, knowledge, or behaviors not captured in our study. Last, we do not know the feasibility  
40 or acceptability of a telerehabilitation intervention in this population.  
41  
42  
43  
44  
45  
46  
47  
48  
49  
50  
51  
52  
53  
54

## 55 **CONCLUSION**

1  
2  
3 Features of telerehabilitation interventions for lung cancer survivors following curative intent  
4 therapy may need to include strategies to improve self-efficacy and skills in telemedicine.  
5  
6 Education to improve knowledge of potential benefits of rehabilitation and exercise training may  
7 increase uptake. Exercise training with live therapist interaction, to target specific symptoms,  
8 physical and psychological impairments, and/or facilitate comorbidity control, with alignment to  
9 patient formulated goals, may enhance learning, adherence, and completion. Future work  
10 should determine how to incorporate these features into telerehabilitation programs.  
11  
12  
13  
14  
15  
16  
17  
18  
19  
20  
21  
22  
23  
24  
25  
26  
27  
28  
29  
30  
31  
32  
33  
34  
35  
36  
37  
38  
39  
40  
41  
42  
43  
44  
45  
46  
47  
48  
49  
50  
51  
52  
53  
54  
55  
56  
57  
58  
59  
60

## Author Contributions

DMH, MAN, RPK, and LMH contributed substantially to the study design, data analysis and interpretation, writing, and/or final approval of the manuscript. DBB, MLN, SKR, JES-L, JLS, AVP, and RLK contributed substantially to the study design, interpretation, writing, and/or final approval of the manuscript.

## Competing interest

All authors declare that no competing interest exists.

## Funding

This work was supported by the Career Development Award (1K2RX003661, PI Ha) from the United States (U.S.) Department of Veterans Affairs, Rehabilitation Research and Development Service.

## Acknowledgement

The views expressed in this article are those of the authors and do not necessarily reflect the position or policy of the Department of Veterans Affairs or the U.S. government. The following authors were employed (job title) at the Rocky Mountain Regional Veterans Affairs Medical Center, Aurora, Colorado: DMH, DBB, MLN, SKR (Staff Physician/Surgeon); RLK (Associate Chief of Staff, Research Service); MAN and RPK (Health Sciences Specialist); LMH (Health Research Scientist); and JES-L (GRECC Researcher). DMH, LMH, DBB, MLN, SKR, JSL, JES-L, AVP, and RLK also hold academic appointments at the University of Colorado School of



1  
2  
3 Medicine. Dr Ha is also supported by the American Lung Association Lung Cancer Discovery  
4 Award (820773). The American Lung Association had no role in the study design, data  
5 collection, analysis, or interpretation, writing, or decision to submit the article for publication.  
6  
7  
8  
9  
10  
11  
12  
13  
14

### 15 **Ethics Approval**

16  
17 This study involved human participants and was approved by the Colorado Multiple Institutional  
18 Review Board (21-4701). All participants gave informed consent to participate in the study  
19 before taking part.  
20  
21  
22  
23  
24  
25  
26

### 27 **Data Availability Statement**

28  
29 Not applicable – this study is not a clinical trial and does not meet requirements for data sharing  
30 per *Tier 2* journal policy.  
31  
32  
33  
34  
35  
36  
37

### 38 **Abbreviations**

39  
40 COPD = chronic obstructive pulmonary disease; CT = computed tomography; FEV<sub>1</sub> = forced  
41 expiratory volume in one second; FVC = forced vital capacity; OSA = obstructive sleep apnea;  
42  
43 SBRT = stereotactic body radiotherapy; RMR VAMC = Rocky Mountain Regional Veterans  
44 Affairs Medical Center; SCT = Social Cognitive Theory; SD = standard deviation  
45  
46  
47  
48  
49  
50  
51  
52  
53  
54  
55  
56  
57  
58  
59  
60

## Tables

Table 1: Participant Characteristics

| Characteristic (N=20)                                           | Value          |
|-----------------------------------------------------------------|----------------|
| Age, years, mean $\pm$ SD                                       | 71.2 $\pm$ 5.5 |
| Age $\geq$ 65 years, %                                          | 80             |
| Male, %                                                         | 90             |
| White, non-Hispanic, %                                          | 95             |
| Married, %                                                      | 65             |
| College education or higher, %                                  | 65             |
| Employed, %                                                     | 10             |
| Marginal or limited health literacy (BRIEF scale), %            | 40             |
| Frail (FRAIL scale), %                                          | 40             |
| Home access to internet, %                                      | 85             |
| Rural living environment <sup>*</sup> , %                       | 25             |
| Prior experience with telemedicine <sup>†</sup> , %             | 85             |
| Smoking status <sup>**</sup> , %                                |                |
| Current                                                         | 45             |
| Former                                                          | 55             |
| Comorbidities, %                                                |                |
| COPD <sup>‡</sup>                                               | 90             |
| Oxygen therapy (1-6 liters/minute)                              | 40             |
| OSA                                                             | 25             |
| Psychiatric illness <sup>§</sup>                                | 40             |
| Lung cancer characteristics, %                                  |                |
| Screen-detected                                                 | 35             |
| Adenocarcinoma <sup>  </sup> /squamous/small-cell/presumed      | 60/25/5/10     |
| Collaborative stage IA/IIA/IIIA                                 | 75/10/15       |
| Curative intent therapy modality, %                             |                |
| Surgical resection <sup>¶</sup>                                 | 40             |
| SBRT                                                            | 40             |
| Chemoradiation                                                  | 20             |
| Time since primary treatment completion, months, median (range) | 2 (1-6)        |

<sup>\*</sup>Defined by the Veterans Health Administration Office of Rural Health (i.e., areas with < 30% of the population residing in an urbanized area) using zip code of residence.

<sup>\*\*</sup>As documented clinically in participants' electronic health records.

<sup>†</sup>Via telephone or video visits.

<sup>‡</sup>Defined as post-bronchodilator FEV<sub>1</sub>/FVC < 70%.

<sup>§</sup>Defined as clinically diagnosed depression, anxiety, post-traumatic stress disorder, bipolar, or schizophrenia.

<sup>||</sup>Including 1 case of adeno-squamous carcinoma.

<sup>¶</sup>Of which 6 were lobectomies and 2 sub-lobar (1 segmentectomy; 1 wedge) resections.

COPD = chronic obstructive pulmonary disease; FEV<sub>1</sub> = forced expiratory volume in one second; FVC = forced vital capacity; OSA = obstructive sleep apnea; SBRT = stereotactic body radiotherapy; SD = standard deviation

Table 2: Attitudes and Perceived Self-Efficacy Towards Telemedicine

| Illustrative Quotes                                                                                                                                                                                                                                                                         | Participant ID |
|---------------------------------------------------------------------------------------------------------------------------------------------------------------------------------------------------------------------------------------------------------------------------------------------|----------------|
| <b>(A) Telemedicine is convenient</b>                                                                                                                                                                                                                                                       |                |
| "It's nice to have a [telemedicine visit], talk about things and not have to worry about showing up somewhere... 100-and-some miles away. I think [telemedicine is very] darn convenient."                                                                                                  | Participant 7  |
| "I think [telemedicine] is a good idea. Some people... come in-person to see an actual physician, but if they can see [the physician] on the phone, talk to [him or her remotely], I think it works out great."                                                                             | Participant 2  |
| "Some appointments... have to be physical, but unless [the doctor's] physical presence is required, I'm going to, as much as possible, work on video appointments."                                                                                                                         | Participant 12 |
| "I think [telemedicine] is a great idea... it keeps everybody safer [because] people aren't driving to the hospital sick... to go in for a meeting [with a clinician]."                                                                                                                     | Participant 18 |
| "I think [telemedicine] would be a lot more convenient, rather than having to go to a building [for in-person visits]."                                                                                                                                                                     | Participant 13 |
| <b>(B) Telemedicine is impersonal</b>                                                                                                                                                                                                                                                       |                |
| "Depending on the [health] issues... you have to [be in person] to see what's going on. You can't listen to breathing over [the] internet [or] phone... I'd rather have a one-to-one in-person appointment."                                                                                | Participant 2  |
| "I like the face-to-face [visits]. When it comes to issues like what I have, I want face-to-face [visits]. I want to feel comfortable with who I'm talking to... [telemedicine] is too cold and sterile."                                                                                   | Participant 17 |
| "[I've had experience with telemedicine (video and telephone)], and I think that the video takes away [the hands-on interaction]. In-person visits [are] better."                                                                                                                           | Participant 16 |
| "I'd rather go physically [for my appointments] and have them talk to my face."                                                                                                                                                                                                             | Participant 20 |
| "I've talked to my heart doctor now and again about changing my medicine [over the phone]. But that's about it [regarding my experience with telemedicine]. Otherwise, I go to the VA [physically for my appointments]. I'm very happy with the VA. I'd rather [have my visits] in-person." | Participant 15 |
| "[I am hesitant to use telemedicine]. I like the one-on-one health experiences."                                                                                                                                                                                                            | Participant 10 |
| <b>(C) Telemedicine is technologically challenging</b>                                                                                                                                                                                                                                      |                |
| "[I've had experience with remote care] a couple of times... with video, and as far as the technology, I had a [heck] of a time with it. I had to actually go into the VA and have the nurse show me how to do it because I'm not really [technical]."                                      | Participant 7  |
| "[I've received care remotely], via video... [but at times needed] to use the telephone. I'm just not computer literate [...]. I did get a tablet from the VA [for remote care]... but now I don't know my password. I forgot it."                                                          | Participant 3  |
| "[I've not received remote care via video because] I'm not too computer savvy."                                                                                                                                                                                                             | Participant 9  |

|                                                                                                                                                                                                                                                                                                                                                             |                                                                                                                                                                                                                                                                                                                                                                                                                                                                                                                                                                                                                                                                                                                          |                                                                                       |
|-------------------------------------------------------------------------------------------------------------------------------------------------------------------------------------------------------------------------------------------------------------------------------------------------------------------------------------------------------------|--------------------------------------------------------------------------------------------------------------------------------------------------------------------------------------------------------------------------------------------------------------------------------------------------------------------------------------------------------------------------------------------------------------------------------------------------------------------------------------------------------------------------------------------------------------------------------------------------------------------------------------------------------------------------------------------------------------------------|---------------------------------------------------------------------------------------|
| 1<br>2<br>3<br>4<br>5<br>6<br>7<br>8<br>9<br>10<br>11<br>12<br>13<br>14<br>15<br>16<br>17<br>18<br>19<br>20<br>21<br>22<br>23<br>24<br>25<br>26<br>27<br>28<br>29<br>30<br>31<br>32<br>33<br>34<br>35<br>36<br>37<br>38<br>39<br>40<br>41<br>42<br>43<br>44<br>45<br>46<br>47<br>48<br>49<br>50<br>51<br>52<br>53<br>54<br>55<br>56<br>57<br>58<br>59<br>60 | <p>“My computer skills are limited...I would have to have hands-on teaching [to have video visits].”</p> <p>“[I anticipate that with video visits, I would have] my standard problems (with the software) and beat[ing] my head against the wall trying to get it going, but I’ll get it going if I need to.”</p> <p>“I don’t know how to use the computers. I’m challenged with the computer ...[I would be more comfortable with video visits if] somebody [could] walk [me] through it, like over the phone.”</p> <p>“[I’ve received care remotely], over the phone...I’m probably not as versed as most people [with video visits]. [For video visits,] I [would] get my daughter over here and help me, maybe.”</p> | <p>Participant 8</p> <p>Participant 11</p> <p>Participant 5</p> <p>Participant 10</p> |
|-------------------------------------------------------------------------------------------------------------------------------------------------------------------------------------------------------------------------------------------------------------------------------------------------------------------------------------------------------------|--------------------------------------------------------------------------------------------------------------------------------------------------------------------------------------------------------------------------------------------------------------------------------------------------------------------------------------------------------------------------------------------------------------------------------------------------------------------------------------------------------------------------------------------------------------------------------------------------------------------------------------------------------------------------------------------------------------------------|---------------------------------------------------------------------------------------|

For peer review only

Table 3: Knowledge of Benefits of Rehabilitation and Exercise Training

| Illustrative Quotes                                                                                                                                                                                                                                                      | Participant ID |
|--------------------------------------------------------------------------------------------------------------------------------------------------------------------------------------------------------------------------------------------------------------------------|----------------|
| <b>(A) Limited knowledge of benefits of rehabilitation/exercise training</b>                                                                                                                                                                                             |                |
| "You're talking in strange territory there [about the types of exercises or how to do them]. I've had no instructions whatsoever...other than the [incentive] spirometer. About breathing exercises or any of that stuff, I just haven't had any [instructions]."        | Participant 1  |
| "I really don't have any [understanding of the types of exercises and how they can or cannot help with my health]."                                                                                                                                                      | Participant 9  |
| "The only [type of exercise] I can think of is cardio [...]. Rehab [for me has to] have something to exercise the lungs [...]. If there were exercises that would help me with my falls, yeah [I'd also be interested to learn]; I've got scars all over my face."       | Participant 17 |
| "I really learned to exercise in the Army. I don't use them all, but I exercise once in a while."                                                                                                                                                                        | Participant 6  |
| <b>(B) Neutral-to-positive views on rehabilitation</b>                                                                                                                                                                                                                   |                |
| "I think [of rehabilitation as] a physical therapy thing, not getting over being a drunk [or substance use disorder]...for me, [rehabilitation is] to keep my body working the way it's supposed to be working."                                                         | Participant 1  |
| "[Rehabilitation or exercise would help] quite a bit [with my health]. I would feel better. Anytime I exercise it helps me feel better."                                                                                                                                 | Participant 3  |
| "Rehabilitation means...to get yourself better, to work yourself through something to make your life better."                                                                                                                                                            | Participant 18 |
| "Rehab would be trying to make my lungs better and techniques to be more comfortable, and hopefully I can deal with the issues from lung cancer much better, like breath control...things that I could use if I start getting short of breath."                          | Participant 2  |
| "My thing with rehabilitation is if you have a problem, you need to get somebody to help you solve your problem. That's rehabilitation. I don't care if drugs or alcohol, eating disorder, or something, all kinds of stuff out there. People need rehab, they need it." | Participant 6  |
| "To me [rehabilitation is] extremely positive."                                                                                                                                                                                                                          | Participant 12 |

Table 4: Perceived Facilitators and Preferences Towards Telerehabilitation

| Illustrative Quotes                                                                                                                                                                                                                          | Participant ID |
|----------------------------------------------------------------------------------------------------------------------------------------------------------------------------------------------------------------------------------------------|----------------|
| <b>(A) Live therapist interaction as a facilitator</b>                                                                                                                                                                                       |                |
| “[It is] absolutely important [to have live interaction with a therapist [...]. By having [live interaction with] a PT (physical therapy) person, [the therapy is] more specifically tailored for me....”                                    | Participant 12 |
| “[Having live interaction with a therapist is] very important to make sure if I’m doing things the right way, [particularly] if there’s some kind of technique or twisting or bending motion.”                                               | Participant 2  |
| “[Telerehabilitation] would be fine as long as they could view me while the session was going on...I think it would be very important to [to have live interaction with a therapist].”                                                       | Participant 8  |
| “[Having live interaction with a therapist is] the ideal for me.”                                                                                                                                                                            | Participant 6  |
| “If there is not an instructor or something, I probably wouldn’t do it.”                                                                                                                                                                     | Participant 3  |
| <b>(B) Predominant preference for one-on-one over group telerehabilitation</b>                                                                                                                                                               |                |
| “I prefer one-on-one’s. I’ve always been that way...I’m kind of shy in front of big groups...I don’t like being around a lot of people...I feel like everybody is staring at me.”                                                            | Participant 18 |
| “[My ideal telerehabilitation program] would be face-to-face conference...[one-on-one] if the clinician isn’t overworked.”                                                                                                                   | Participant 11 |
| “If you had a bunch of other people [in telerehabilitation together], I’d feel kind of inadequate...I’m not tech savvy.”                                                                                                                     | Participant 13 |
| “I think having one-on-one is probably ideal, but I think you could probably get the same message, especially if it’s people that had the same surgery and they’re recovering from the same thing, then the group would probably work fine.” | Participant 5  |

Table 5: Health Goals Following Curative Intent Therapy of Lung Cancer

| Illustrative Quotes                                                                                                                                                                                                                                                                                                                                                                                                                                          | Participant ID |
|--------------------------------------------------------------------------------------------------------------------------------------------------------------------------------------------------------------------------------------------------------------------------------------------------------------------------------------------------------------------------------------------------------------------------------------------------------------|----------------|
| <b>(A) Common questions or concerns about lung cancer status</b>                                                                                                                                                                                                                                                                                                                                                                                             |                |
| "I'm thinking about [recovering]. I'm [going to] find out...in a couple of weeks whether or not this [radiation treatment] did any good."                                                                                                                                                                                                                                                                                                                    | Participant 7  |
| "I haven't seen anybody since my treatment. I don't have an appointment... until the 23 <sup>rd</sup> of September...when I go in...to do another CT scan to see if they got all of the cancer [...]. Then on the 27 <sup>th</sup> or 29 <sup>th</sup> (of September) [my oncologist] will go ahead and give me the results of the CT scan and let me know, 'hey, it's all gone', or 'hey, there's still something there' or what we're [going to] do next." | Participant 18 |
| "The only concern I have [is about] the lung cancer coming back."                                                                                                                                                                                                                                                                                                                                                                                            | Participant 17 |
| "I'm kind of in a limbo until I know [about my lung cancer status]. And once I know one way or another, what the deal is, I'll remain in limbo. After I find out for sure what's happening [with my lung cancer status], then I can be more [purposeful] as far as what my aspirations are."                                                                                                                                                                 | Participant 13 |
| "Well, naturally, [my goal is] to improve. Hopefully the radiation...has done its job and taken care of it – the lung cancer that I had, the spot wasn't that big."                                                                                                                                                                                                                                                                                          | Participant 4  |
| "I'm basically doing pretty good right now [...]. I just won't know [about my lung cancer status] until July."                                                                                                                                                                                                                                                                                                                                               | Participant 6  |
| <b>(B-i) Physical and psychosocial functioning, comorbidity control</b>                                                                                                                                                                                                                                                                                                                                                                                      |                |
| "I'd like to have better balance [with walking]."                                                                                                                                                                                                                                                                                                                                                                                                            | Participant 8  |
| "I'd like to improve my mobility [...]. I'm [also] hoping to relieve some pain [...]. I walk about 15 minutes and...I'm spent."                                                                                                                                                                                                                                                                                                                              | Participant 10 |
| "[My goal is to be] able to get around without breathing hard."                                                                                                                                                                                                                                                                                                                                                                                              | Participant 14 |
| "Hopefully the neuropathy will dissipate, and I can go back to doing my needlework (art craft)."                                                                                                                                                                                                                                                                                                                                                             | Participant 2  |
| "I'm getting TMS (transcranial magnetic stimulation, an approach to treat anxiety and depression) so I want to finish that."                                                                                                                                                                                                                                                                                                                                 | Participant 3  |
| "I have arthritis; I try to walk one mile every morning."                                                                                                                                                                                                                                                                                                                                                                                                    | Participant 15 |
| <b>(B-ii) Health promotion and disease prevention</b>                                                                                                                                                                                                                                                                                                                                                                                                        |                |
| "My health goals are to stay healthy [...]. I'm 64 years old, and because I've taken care of myself and [have] had plenty of exercise, I'm still pretty healthy."                                                                                                                                                                                                                                                                                            | Participant 17 |
| "I'd like to get out a little bit more [...]. I like going to the park but I get a little bit apprehensive to get out and walk too long."                                                                                                                                                                                                                                                                                                                    | Participant 20 |
| "I'm a smoker, so I'm trying to quit. That's my big goal."                                                                                                                                                                                                                                                                                                                                                                                                   | Participant 15 |
| "[My goal is to try] to quit smoking."                                                                                                                                                                                                                                                                                                                                                                                                                       | Participant 4  |



## References

1. Siegel RL, Miller KD, Wagle NS, Jemal A. Cancer statistics, 2023. *CA Cancer J Clin* 2023;73(1):17-48. (In eng). DOI: 10.3322/caac.21763.
2. Sung H, Ferlay J, Siegel RL, et al. Global Cancer Statistics 2020: GLOBOCAN Estimates of Incidence and Mortality Worldwide for 36 Cancers in 185 Countries. *CA: a cancer journal for clinicians* 2021;71(3):209-249. (In eng). DOI: 10.3322/caac.21660 [doi].
3. Gould MK, Munoz-Plaza CE, Hahn EE, Lee JS, Parry C, Shen E. Comorbidity Profiles and Their Effect on Treatment Selection and Survival among Patients with Lung Cancer. *Annals of the American Thoracic Society* 2017;14(10):1571-1580. (In eng). DOI: 10.1513/AnnalsATS.201701-030OC [doi].
4. Ha DM, Zeng C, Chan ED, et al. Association of Exercise Behavior with Overall Survival in Stage I-III A Lung Cancer. *Annals of the American Thoracic Society* 2020 (In eng). DOI: 10.1513/AnnalsATS.202003-235OC [doi].
5. McDonald F, De Waele M, Hendriks LE, Faivre-Finn C, Dingemans AC, Van Schil PE. Management of stage I and II nonsmall cell lung cancer. *Eur Respir J* 2017;49(1) (In eng). DOI: 10.1183/13993003.00764-2016.
6. Daly ME, Singh N, Ismaila N, et al. Management of Stage III Non-Small-Cell Lung Cancer: ASCO Guideline. *J Clin Oncol* 2022;40(12):1356-1384. (In eng). DOI: 10.1200/jco.21.02528.
7. Siegel RL, Miller KD, Fuchs HE, Jemal A. Cancer Statistics, 2021. *CA: a cancer journal for clinicians* 2021;71(1):7-33. (In eng). DOI: 10.3322/caac.21654 [doi].
8. State of Lung Cancer - 2022 Report. American Lung Association (<https://www.lung.org/getmedia/381ca407-a4e9-4069-b24b-195811f29a00/SOLC-2020->).
9. Silvestri GA, Vachani A, Whitney D, et al. A Bronchial Genomic Classifier for the Diagnostic Evaluation of Lung Cancer. *N Engl J Med* 2015;373(3):243-51. (In eng). DOI: 10.1056/NEJMoa1504601.
10. Hattori A, Hirayama S, Matsunaga T, et al. Distinct Clinicopathologic Characteristics and Prognosis Based on the Presence of Ground Glass Opacity Component in Clinical Stage IA Lung Adenocarcinoma. *J Thorac Oncol* 2019;14(2):265-275. (In eng). DOI: 10.1016/j.jtho.2018.09.026.
11. Antonia SJ, Villegas A, Daniel D, et al. Overall Survival with Durvalumab after Chemoradiotherapy in Stage III NSCLC. *The New England journal of medicine* 2018;379(24):2342-2350. (In eng). DOI: 10.1056/NEJMoa1809697 [doi].
12. Wu YL, Tsuboi M, He J, et al. Osimertinib in Resected EGFR-Mutated Non-Small-Cell Lung Cancer. *The New England journal of medicine* 2020 (In eng). DOI: 10.1056/NEJMoa2027071 [doi].
13. Saji H, Okada M, Tsuboi M, et al. Segmentectomy versus lobectomy in small-sized peripheral non-small-cell lung cancer (JCOG0802/WJOG4607L): a multicentre, open-label, phase 3, randomised, controlled, non-inferiority trial. *Lancet* 2022;399(10335):1607-1617. (In eng). DOI: 10.1016/s0140-6736(21)02333-3.
14. Jänne PA, Riely GJ, Gadgeel SM, et al. Adagrasib in Non-Small-Cell Lung Cancer Harboring a KRAS(G12C) Mutation. *N Engl J Med* 2022;387(2):120-131. (In eng). DOI: 10.1056/NEJMoa2204619.
15. Forde PM, Spicer J, Lu S, et al. Neoadjuvant Nivolumab plus Chemotherapy in Resectable Lung Cancer. *N Engl J Med* 2022;386(21):1973-1985. (In eng). DOI: 10.1056/NEJMoa2202170.
16. Wang Q, Stone K, Kern JA, et al. Adverse Events Following Limited Resection versus Stereotactic Body Radiation Therapy for Early-Stage Lung Cancer. *Ann Am Thorac Soc* 2022 (In eng). DOI: 10.1513/AnnalsATS.202203-275OC.
17. Nugent SM, Golden SE, Hooker ER, et al. Longitudinal Health-related Quality of Life among Individuals Considering Treatment for Stage I Non-Small-Cell Lung Cancer. *Annals of the*



- 1  
2  
3 American Thoracic Society 2020;17(8):988-997. (In eng). DOI: 10.1513/AnnalsATS.202001-  
4 029OC [doi].
- 5 18. Global Burden of Disease Cancer C, Fitzmaurice C, Abate D, et al. Global, Regional, and National  
6 Cancer Incidence, Mortality, Years of Life Lost, Years Lived With Disability, and Disability-  
7 Adjusted Life-Years for 29 Cancer Groups, 1990 to 2017: A Systematic Analysis for the Global  
8 Burden of Disease Study. *JAMA oncology* 2019;5(12):1749-1768. (In eng). DOI:  
9 10.1001/jamaoncol.2019.2996 [doi].
- 10 19. Joshy G, Thandrayen J, Koczwara B, et al. Disability, psychological distress and quality of life in  
11 relation to cancer diagnosis and cancer type: population-based Australian study of 22,505  
12 cancer survivors and 244,000 people without cancer. *BMC medicine* 2020;18(1):372-020-01830-  
13 4. (In eng). DOI: 10.1186/s12916-020-01830-4 [doi].
- 14 20. Colt HG, Murgu SD, Korst RJ, Slatore CG, Unger M, Quadrelli S. Follow-up and surveillance of the  
15 patient with lung cancer after curative-intent therapy: Diagnosis and management of lung  
16 cancer, 3rd ed: American College of Chest Physicians evidence-based clinical practice guidelines.  
17 *Chest* 2013;143(5 Suppl):e437S-54S. (In eng). DOI: 10.1378/chest.12-2365; 10.1378/chest.12-  
18 2365.
- 19 21. Cavalheri V, Burtin C, Formico VR, et al. Exercise training undertaken by people within 12  
20 months of lung resection for non-small cell lung cancer. *The Cochrane database of systematic  
21 reviews* 2019;6:CD009955. (In eng). DOI: 10.1002/14651858.CD009955.pub3 [doi].
- 22 22. Driessen EJ, Peeters ME, Bongers BC, et al. Effects of prehabilitation and rehabilitation including  
23 a home-based component on physical fitness, adherence, treatment tolerance, and recovery in  
24 patients with non-small cell lung cancer: A systematic review. *Critical reviews in  
25 oncology/hematology* 2017;114:63-76. (In eng). DOI: S1040-8428(16)30363-8 [pii].
- 26 23. Holland AE, Cox NS, Houchen-Wolloff L, et al. Defining Modern Pulmonary Rehabilitation. An  
27 Official American Thoracic Society Workshop Report. *Annals of the American Thoracic Society*  
28 2021;18(5):e12-e29. (In eng). DOI: 10.1513/AnnalsATS.202102-146ST [doi].
- 29 24. Davidoff C, Maltser S. Chapter 6 - Telerehabilitation in Cancer Care. In: Alexander M, ed.  
30 *Telerehabilitation*. New Delhi: Elsevier; 2022:71-89.
- 31 25. O'Brien BC, Harris IB, Beckman TJ, Reed DA, Cook DA. Standards for reporting qualitative  
32 research: a synthesis of recommendations. *Acad Med* 2014;89(9):1245-51. (In eng). DOI:  
33 10.1097/acm.0000000000000388.
- 34 26. Tolley EEU, P.R.; Mack, N.; Robinson, E.T.; Succop S.M. *Designing the Study. Qualitative  
35 Methods in Public Health - A Field Guide for Applied Research*. Second ed. San Francisco,  
36 California: John Wiley & Sons; 2016.
- 37 27. Hollin IL, Craig BM, Coast J, et al. Reporting Formative Qualitative Research to Support the  
38 Development of Quantitative Preference Study Protocols and Corresponding Survey  
39 Instruments: Guidelines for Authors and Reviewers. *Patient* 2020;13(1):121-136. (In eng). DOI:  
40 10.1007/s40271-019-00401-x.
- 41 28. Bandura A. Health promotion by social cognitive means. *Health education & behavior : the  
42 official publication of the Society for Public Health Education* 2004;31(2):143-164. (In eng). DOI:  
43 10.1177/1090198104263660 [doi].
- 44 29. Stacey FG, James EL, Chapman K, Courneya KS, Lubans DR. A systematic review and meta-  
45 analysis of social cognitive theory-based physical activity and/or nutrition behavior change  
46 interventions for cancer survivors. *Journal of cancer survivorship : research and practice*  
47 2015;9(2):305-338. (In eng). DOI: 10.1007/s11764-014-0413-z [doi].
- 48 30. Turner RR, Steed L, Quirk H, et al. Interventions for promoting habitual exercise in people living  
49 with and beyond cancer. *The Cochrane database of systematic reviews* 2018;9:CD010192. (In  
50 eng). DOI: 10.1002/14651858.CD010192.pub3 [doi].
- 51  
52  
53  
54  
55  
56  
57  
58  
59  
60

- 1
  - 2
  - 3
  - 4
  - 5
  - 6
  - 7
  - 8
  - 9
  - 10
  - 11
  - 12
  - 13
  - 14
  - 15
  - 16
  - 17
  - 18
  - 19
  - 20
  - 21
  - 22
  - 23
  - 24
  - 25
  - 26
  - 27
  - 28
  - 29
  - 30
  - 31
  - 32
  - 33
  - 34
  - 35
  - 36
  - 37
  - 38
  - 39
  - 40
  - 41
  - 42
  - 43
  - 44
  - 45
  - 46
  - 47
  - 48
  - 49
  - 50
  - 51
  - 52
  - 53
  - 54
  - 55
  - 56
  - 57
  - 58
  - 59
  - 60
31. Smith SM, Partridge MR. Getting the rehabilitation message across: emerging barriers and positive health benefits. *The European respiratory journal* 2009;34(1):2-4. (In eng). DOI: 10.1183/09031936.00025309 [doi].
32. Hsieh HF, Shannon SE. Three approaches to qualitative content analysis. *Qualitative health research* 2005;15(9):1277-1288. (In eng). DOI: 15/9/1277 [pii].
33. Raskind IG, Shelton RC, Comeau DL, Cooper HLF, Griffith DM, Kegler MC. A Review of Qualitative Data Analysis Practices in Health Education and Health Behavior Research. *Health Educ Behav* 2019;46(1):32-39. (In eng). DOI: 10.1177/1090198118795019.
34. Braun V, Clarke V. Using thematic analysis in psychology. *Qualitative Research in Psychology* 2006;3(2):77-101. DOI: 10.1191/1478088706qp063oa.
35. Nekhlyudov L, Mollica MA, Jacobsen PB, Mayer DK, Shulman LN, Geiger AM. Developing a Quality of Cancer Survivorship Care Framework: Implications for Clinical Care, Research, and Policy. *Journal of the National Cancer Institute* 2019;111(11):1120-1130. (In eng). DOI: 10.1093/jnci/djz089 [doi].
36. Creswell JW. *Qualitative inquiry and research design: Choosing among five traditions*. Thousand Oaks, CA, US: Sage Publications, Inc, 1998.
37. Vasileiou K, Barnett J, Thorpe S, Young T. Characterising and justifying sample size sufficiency in interview-based studies: systematic analysis of qualitative health research over a 15-year period. *BMC Med Res Methodol* 2018;18(1):148. (In eng). DOI: 10.1186/s12874-018-0594-7.
38. Guest G, Namey E, Chen M. A simple method to assess and report thematic saturation in qualitative research. *PloS one* 2020;15(5):e0232076. (In eng). DOI: 10.1371/journal.pone.0232076 [doi].
39. Cox A, Lucas G, Marcu A, et al. Cancer Survivors' Experience With Telehealth: A Systematic Review and Thematic Synthesis. *J Med Internet Res* 2017;19(1):e11. (In eng). DOI: 10.2196/jmir.6575.
40. Brunton L, Bower P, Sanders C. The Contradictions of Telehealth User Experience in Chronic Obstructive Pulmonary Disease (COPD): A Qualitative Meta-Synthesis. *PLoS One* 2015;10(10):e0139561. (In eng). DOI: 10.1371/journal.pone.0139561.
41. Al-Naher A, Downing J, Scott KA, Pirmohamed M. Factors Affecting Patient and Physician Engagement in Remote Health Care for Heart Failure: Systematic Review. *JMIR Cardio* 2022;6(1):e33366. (In eng). DOI: 10.2196/33366.
42. Leonardsen AL, Hardeland C, Helgesen AK, Grøndahl VA. Patient experiences with technology enabled care across healthcare settings- a systematic review. *BMC Health Serv Res* 2020;20(1):779. (In eng). DOI: 10.1186/s12913-020-05633-4.
43. Timmerman JG, Tönis TM, Dekker-van Weering MG, et al. Co-creation of an ICT-supported cancer rehabilitation application for resected lung cancer survivors: design and evaluation. *BMC Health Serv Res* 2016;16:155. (In eng). DOI: 10.1186/s12913-016-1385-7.
44. Beer JM, Smith KN, Kennedy T, et al. A Focus Group Evaluation of Breathe Easier: A Mindfulness-Based mHealth App for Survivors of Lung Cancer and Their Family Members. *Am J Health Promot* 2020;34(7):770-778. (In eng). DOI: 10.1177/0890117120924176.
45. Granger CL, Connolly B, Denehy L, et al. Understanding factors influencing physical activity and exercise in lung cancer: a systematic review. *Supportive care in cancer : official journal of the Multinational Association of Supportive Care in Cancer* 2017;25(3):983-999. (In eng). DOI: 10.1007/s00520-016-3484-8 [doi].
46. Leach HJ, Devonish JA, Bebb DG, Krenz KA, Culos-Reed SN. Exercise preferences, levels and quality of life in lung cancer survivors. *Supportive care in cancer : official journal of the Multinational Association of Supportive Care in Cancer* 2015;23(11):3239-3247. (In eng). DOI: 10.1007/s00520-015-2717-6 [doi].

- 1
- 2
- 3
- 4 47. Philip EJ, Coups EJ, Feinstein MB, Park BJ, Wilson DJ, Ostroff JS. Physical activity preferences of
- 5 early-stage lung cancer survivors. *Supportive care in cancer : official journal of the Multinational*
- 6 *Association of Supportive Care in Cancer* 2014;22(2):495-502. (In eng). DOI: 10.1007/s00520-
- 7 *013-2002-5 [doi].*
- 8 48. Lin YY, Lai YF, Lu HI, Lai YL, Lin CC. Physical activity preferences among patients with lung cancer
- 9 in Taiwan. *Cancer nursing* 2013;36(2):155-162. (In eng). DOI: 10.1097/NCC.0b013e31825f4db1
- 10 *[doi].*
- 11 49. Granger CL, Parry SM, Edbrooke L, et al. Improving the delivery of physical activity services in
- 12 lung cancer: A qualitative representation of the patient's perspective. *European journal of*
- 13 *cancer care* 2019;28(1):e12946. (In eng). DOI: 10.1111/ecc.12946 [doi].
- 14 50. Kuijpers W, Groen WG, Loos R, et al. An interactive portal to empower cancer survivors: a
- 15 qualitative study on user expectations. *Supportive care in cancer : official journal of the*
- 16 *Multinational Association of Supportive Care in Cancer* 2015;23(9):2535-2542. (In eng). DOI:
- 17 *10.1007/s00520-015-2605-0 [doi].*
- 18 51. Gralla RJ, Hollen PJ, Msaouel P, Davis BV, Petersen J. An evidence-based determination of issues
- 19 affecting quality of life and patient-reported outcomes in lung cancer: results of a survey of 660
- 20 patients. *Journal of thoracic oncology : official publication of the International Association for*
- 21 *the Study of Lung Cancer* 2014;9(9):1243-1248. (In eng). DOI: 10.1097/JTO.0000000000000244
- 22 *[doi].*
- 23 52. Spruit MA, Singh SJ, Garvey C, et al. An official American Thoracic Society/European Respiratory
- 24 Society statement: key concepts and advances in pulmonary rehabilitation. *American journal of*
- 25 *respiratory and critical care medicine* 2013;188(8):e13-64. (In eng). DOI: 10.1164/rccm.201309-
- 26 *1634ST [doi].*
- 27 53. Luigjes-Huizer YL, Tauber NM, Humphris G, et al. What is the prevalence of fear of cancer
- 28 recurrence in cancer survivors and patients? A systematic review and individual participant data
- 29 meta-analysis. *Psychooncology* 2022;31(6):879-892. (In eng). DOI: 10.1002/pon.5921.
- 30 54. Bisseling EM, Compen FR, Schellekens MPJ, Thewes B, Speckens AEM, van der Lee ML. Exploring
- 31 Fear of Cancer Recurrence in a Sample of Heterogeneous Distressed Cancer Patients with and
- 32 Without a Psychiatric Disorder. *J Clin Psychol Med Settings* 2021;28(3):419-426. (In eng). DOI:
- 33 *10.1007/s10880-021-09776-2.*
- 34 55. Séguin Leclair C, Lebel S, Westmaas JL. The relationship between fear of cancer recurrence and
- 35 health behaviors: A nationwide longitudinal study of cancer survivors. *Health Psychol*
- 36 *2019;38(7):596-605. (In eng). DOI: 10.1037/hea0000754.*
- 37 56. Simard S, Thewes B, Humphris G, et al. Fear of cancer recurrence in adult cancer survivors: a
- 38 systematic review of quantitative studies. *J Cancer Surviv* 2013;7(3):300-22. (In eng). DOI:
- 39 *10.1007/s11764-013-0272-z.*
- 40 57. Lebel S, Tomei C, Feldstain A, Beattie S, McCallum M. Does fear of cancer recurrence predict
- 41 cancer survivors' health care use? *Support Care Cancer* 2013;21(3):901-6. (In eng). DOI:
- 42 *10.1007/s00520-012-1685-3.*
- 43 58. Butow PN, Turner J, Gilchrist J, et al. Randomized Trial of ConquerFear: A Novel, Theoretically
- 44 Based Psychosocial Intervention for Fear of Cancer Recurrence. *Journal of clinical oncology :*
- 45 *official journal of the American Society of Clinical Oncology* 2017;35(36):4066-4077. (In eng).
- 46 DOI: 10.1200/JCO.2017.73.1257 [doi].
- 47 59. Arch JJ, Mitchell JL, Genung SR, et al. Randomized trial of acceptance and commitment therapy
- 48 for anxious cancer survivors in community clinics: Outcomes and moderators. *J Consult Clin*
- 49 *Psychol* 2021;89(4):327-340. (In eng). DOI: 10.1037/ccp0000630.
- 50
- 51
- 52
- 53
- 54
- 55
- 56
- 57
- 58
- 59

- 1  
2  
3 60. Bade BC, Faiz SA, Ha DM, et al. Cancer-Related Fatigue in Lung Cancer: A Research Agenda. An  
4 Official American Thoracic Society Research Statement. American journal of respiratory and  
5 critical care medicine 2023 (in press).  
6  
7 61. Alfano CM, Leach CR, Smith TG, et al. Equitably improving outcomes for cancer survivors and  
8 supporting caregivers: A blueprint for care delivery, research, education, and policy. CA: a  
9 cancer journal for clinicians 2019;69(1):35-49. (In eng). DOI: 10.3322/caac.21548 [doi].  
10  
11 62. Spruit MA, Wouters EFM. Organizational aspects of pulmonary rehabilitation in chronic  
12 respiratory diseases. Respirology (Carlton, Vic) 2019;24(9):838-843. (In eng). DOI:  
13 10.1111/resp.13512 [doi].  
14  
15 63. Ammous O, Feki W, Lotfi T, et al. Inspiratory muscle training, with or without concomitant  
16 pulmonary rehabilitation, for chronic obstructive pulmonary disease (COPD). Cochrane Database  
17 Syst Rev 2023;1(1):Cd013778. (In eng). DOI: 10.1002/14651858.CD013778.pub2.  
18  
19 64. Blackstock FC, Lareau SC, Nici L, et al. Chronic Obstructive Pulmonary Disease Education in  
20 Pulmonary Rehabilitation. An Official American Thoracic Society/Thoracic Society of Australia  
21 and New Zealand/Canadian Thoracic Society/British Thoracic Society Workshop Report. Annals  
22 of the American Thoracic Society 2018;15(7):769-784. (In eng). DOI: 10.1513/AnnalsATS.201804-  
23 253WS [doi].  
24  
25  
26  
27  
28  
29  
30  
31  
32  
33  
34  
35  
36  
37  
38  
39  
40  
41  
42  
43  
44  
45  
46  
47  
48  
49  
50  
51  
52  
53  
54  
55  
56  
57  
58  
59  
60

1  
2  
3 **Lung Cancer Survivors' Views on Telerehabilitation Following Curative Intent Therapy: A**  
4  
5 **Formative Qualitative Study**  
6  
7  
8  
9

10 Duc M. Ha, MD, MAS; Mary A. Nunnery, MPH, CCRC; Robert P. Klocko, MA; Leah M.  
11 Haverhals, PhD, MA; David B. Bekelman, MD, MPH; Melissa L. New, MD; Simran K.  
12 Randhawa, MBBS; Jennifer E. Stevens-Lapsley, PT, PhD; Jamie L. Studts, PhD; Allan V.  
13 Prochazka, MD, MSc; Robert L. Keith, MD  
14  
15  
16  
17  
18  
19  
20  
21  
22  
23  
24  
25  
26  
27  
28  
29  
30  
31  
32  
33  
34  
35  
36  
37  
38  
39  
40  
41  
42  
43  
44  
45  
46  
47  
48  
49  
50  
51  
52  
53  
54  
55  
56  
57  
58  
59  
60

ONLINE SUPPLEMENT

E-Figure 1: Bandura's Social Cognitive Theory<sup>1</sup> Adapted to Inform Telerehabilitation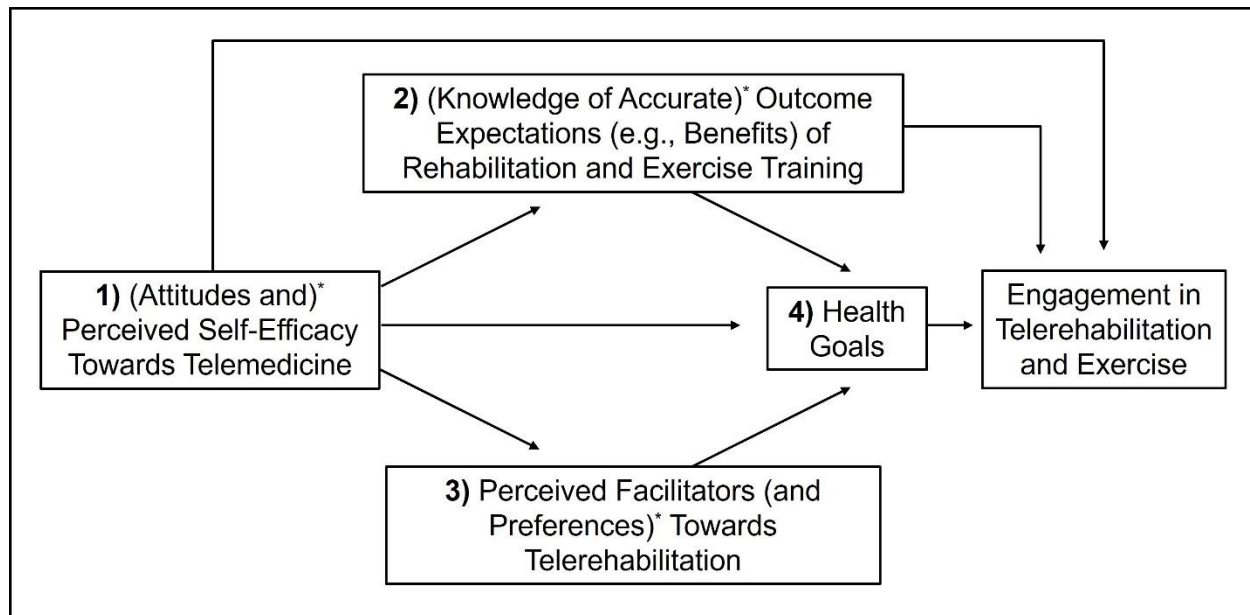

*\*Additional constructs or modifications to the SCT that could influence engagement in telerehabilitation and exercise.*

1  
2  
3 **E-Table 1: Semi-structured Interview Questions Guided by the Social Cognitive Theory<sup>1</sup>**  
4

5 Thank you for taking your time to help us with these questions. In this interview, we will ask you  
6 about your health goals, knowledge on exercise and rehabilitation, and views on technology.  
7 We will also ask you about your level of health literacy, frailty, and basic demographics. These  
8 interviews typically take about 30-45 minutes. We will use the results to help design an ideal  
9 telerehabilitation program for Veterans who recently completed lung cancer treatment.  
10

11 (*Opening question*) To begin, we will start with a broad question – When were you diagnosed  
12 with lung cancer?  
13

14 What treatment did you receive? (surgery, chemo, radiation, etc.)  
15

16 When did you complete the treatment? (1-6 months ago)  
17

18 **How has your experience been** following lung cancer treatment?  
19

20 Have there been any new diagnosis or any new medical issues/concerns following your  
21 treatment?  
22

23 What **health issues** (new symptoms, new limitations to daily activities/daily life; shortness of  
24 breath, poor sleep, or fatigue, neuropathy) have you had to deal with since completing lung  
25 cancer treatment? [possible probes: Can you tell me more about...; Can you describe...more?]  
26

27 How have symptoms impacted your day-to-day activities, hobbies, or ability to complete  
28 tasks?  
29

30 Have you had any falls since completing your treatment (related or non-related to  
31 treatment)?  
32

33 What concerns you most about these health issues that you've had to deal with (since  
34 completing lung cancer treatment)?  
35

36 What is the most important (health) issue you think we should know about your  
37 experience following lung cancer treatment?  
38

39 Thank you for sharing your experience. Now, we will ask you a few questions about your current  
40 and future goals.  
41

42 What are your **health goals** in the next few months and beyond? [possible probes: Can you  
43 describe more about...; Can you explain...more?]  
44

45 What are your goals for the next few months to get your life activities to where you would  
46 like them to be?  
47

48 How are your (health) goals similar or different compared to before your lung cancer  
49 treatment? [possible probes: Describe...more for me; Explain...]  
50

51 How ready do you feel about taking steps to meet these goals? What are some possible  
52 challenges?  
53

54 **What else** would you like to add that you think might be important for us to know about your  
55 health since you completed lung cancer treatment.  
56

57 Thank you for sharing with us your health issues and goals. Next, we would like to understand  
58 more about your knowledge of exercise and rehabilitation.  
59  
60



1  
2  
3 What, if any, have you been **told about exercise** after lung cancer treatment? [possible probes:  
4 Tell me more about...; Explain...]  
5

6 What is your understanding about what types of exercises there are and how they can or  
7 cannot help with your health?

8  
9 What is your understanding about how much exercise can or cannot help with symptoms  
10 we previously discussed (e.g., shortness of breath, poor sleep, or fatigue)?

11  
12 What is your understanding about what types of exercises can reduce falls? How are  
13 these important to you, if at all?

14 When clinicians use the word “rehabilitation”, what does that mean to you? [possible probes:  
15 Tell me more about...; Explain...]  
16

17 How is the **meaning of “rehabilitation”** similar or different compared to some of the  
18 health services that you may have received in the past, like physical or occupational  
19 therapy, or pulmonary or cardiac rehabilitation?  
20

21 Sometimes people think that “rehab” or “rehabilitation” is for substance use or abuse;  
22 how is the meaning of “rehabilitation” negative, positive, or neutral to you?  
23

24 How do you **feel rehabilitation and exercise** can help you achieve your health goals, if at all?  
25 [possible probes: Can you tell me more about...; Describe...]  
26

27 How are your exercise levels different, if at all, after lung cancer treatment?

28 What are some reasons why you exercise or not?  
29

30 How ready do you feel to participate in rehabilitation and exercise in the next few  
31 months?  
32

33 Thank you sharing these thoughts. Part of the reason why are doing this is to help design a  
34 telerehabilitation program for Veterans who recently completed lung cancer treatment. So the  
35 next set of questions will ask you about using **technology for health care**.

36 Recently, a lot of Veterans have had experience receiving care remotely through telephone or  
37 video – where you can see a picture on your phone or computer screen. In the VA, this is called  
38 VA Video Connect, or VVC.  
39

40 Have you received care remotely in VA? Over telephone or video? If you did not do it  
41 over video, why is that?  
42

43 How comfortable do you feel about using computers and the internet for health care  
44 services?  
45

46 What are some challenges you expect to have with video technology? What would help  
47 you feel more comfortable using it?  
48

49 How do you feel about exercise or rehabilitation services delivered remotely using video  
50 technology?  
51

52 Since our goal is to design a telerehabilitation program for Veterans with lung cancer following  
53 treatment,  
54

55 If you could design your **ideal telerehabilitation program**, what would that look like?  
56  
57  
58  
59  
60



How important is having live interaction with a therapist (and one-on-one or in group setting)? Why or why not?

How do you feel about self-help videos for exercises? How can they help or not?

The next set of questions are surveys. Unlike the previous questions, these next questions do not need detailed or lengthy answers since we can only check the answer options available on the surveys.

This first survey assesses your level of **health literacy**.<sup>2</sup>

1) How often do you have someone help you read hospital materials?

Always (1)  Often (2)  Sometimes (3)  Occasionally (4)  Never (5)

2) How often do you have problems learning about your medical condition because of difficulty understanding written information?

Always (1)  Often (2)  Sometimes (3)  Occasionally (4)  Never (5)

3) How often do you have a problem understanding what is told to you about your medical condition?

Always (1)  Often (2)  Sometimes (3)  Occasionally (4)  Never (5)

4) How confident are you filling out medical forms by yourself?

Not at all confident (1)  A little bit (2)  Somewhat (3)  Quite a bit (4)

Extremely confident (5)

This next survey assesses your level of **frailty**.<sup>3</sup>

1) How much of the time during the past 4 weeks did you feel tired?

All of the time  Most of the time  Some of the time  A little of the time  
 None of the time

2) By yourself and not using aids, do you have any difficulty walking up 10 steps without resting?

Yes  No

3) By yourself and not using aids, do you have any difficulty walking a couple of blocks (e.g., several hundred yards)?

Yes  No

4) Did a doctor ever tell you that you have these illnesses? (*check each illness*)

hypertension,  diabetes,  chronic lung disease,  heart attack,  congestive heart failure,  angina,  asthma,  arthritis,  stroke, and  kidney disease. How many?  
[Total number of illnesses, then add 1 for (lung) cancer]: \_\_\_\_\_

5) How much do you weigh? \_\_\_\_\_

6) One year ago, how much did you weigh? \_\_\_\_\_

7) Have you been admitted to the hospital in the past 3 months?  Yes  No

This last set of questions are on your basic **demographics**.

1  
2  
3 1) Are you  
4

5  Married/living with partner;  Divorced/separated;  Widowed; or  
6  Single/Never married?  
7

8 2) What is your highest level of education?

9  Some high school  Completed high school  Some college  
10  Completed college  Graduate or doctorate degree  
11  
12

13 3) What is your employment status?

14  Employed (part- or full-time)  Retired  Disabled  Unemployed  
15

16 4) Do you have access to internet at home?  Yes  No  
17

18 This completes our interview today. Thank you again your time. Please let us know if you have  
19 any questions for us?  
20  
21  
22  
23  
24  
25  
26  
27  
28  
29  
30  
31  
32  
33  
34  
35  
36  
37  
38  
39  
40  
41  
42  
43  
44  
45  
46  
47  
48  
49  
50  
51  
52  
53  
54  
55  
56  
57  
58  
59  
60

1  
2  
3 **E-Table 2: Post-Interview Debrief Guide**  
4

5 In general, how did the interview process go? (e.g., how engaged was the participant; how  
6 candid were the responses; how was your own comfort level?)

7  
8 What were the main **health issues** and **health goals** that came up?

- 9  
10 - Health Issues:  
11 - Health Goals:

12 What were participants' **knowledge** on exercise and rehabilitation?

- 13  
14 - How was their understanding on the types and roles (purpose) of exercise?  
15 - How did they view and define rehabilitation?  
16 - How did they feel about rehabilitation and exercise?

17  
18 How did participants feel about using **technology** for health care?

- 19  
20 - How did they feel about using technology to access health care?  
21 - How did they feel about using technology for rehabilitation services?  
22 - What were key program designs?

23 Did anything surprise you?

24 Did anything **new** come up?

25  
26 Should we change anything about the interview process?

27  
28 Should we change anything on the interview guide?

29  
30 Codes to consider:  
31  
32  
33  
34  
35  
36  
37  
38  
39  
40  
41  
42  
43  
44  
45  
46  
47  
48  
49  
50  
51  
52  
53  
54  
55  
56  
57  
58  
59  
60

**E-Table 3: Operational Definitions of Terminologies for Data Analysis and Interpretation**

| Terminology        | Definition                                                                                                                                                                                                                                                                                                                                                          |
|--------------------|---------------------------------------------------------------------------------------------------------------------------------------------------------------------------------------------------------------------------------------------------------------------------------------------------------------------------------------------------------------------|
| Exercise           | Physical activity which is usually regular and done with the intention of improving or maintaining physical fitness or health. <sup>4</sup>                                                                                                                                                                                                                         |
| Goal               | The end (or result or achievement) toward which effort is directed. <sup>5,6</sup>                                                                                                                                                                                                                                                                                  |
| Rehabilitation     | Restoration of human functions to the maximum degree possible in a person or persons suffering from disease or injury. <sup>7</sup>                                                                                                                                                                                                                                 |
| Self-efficacy      | <i>General:</i> 1) Participant's belief about his/her ability to perform actions necessary to produce a given effect <sup>8</sup> ; and 2) Participant's perception that he/she can exercise control over his/her health habits. <sup>1</sup><br><i>Specific to this study:</i> Participant's belief about his/her ability to use technology to access health care. |
| Telemedicine       | The delivery of health services via remote telecommunications. <sup>9</sup>                                                                                                                                                                                                                                                                                         |
| Telerehabilitation | The delivery of therapeutic rehabilitation at a distance or offsite using telecommunication technologies. <sup>10</sup>                                                                                                                                                                                                                                             |

**References:**

1. Bandura A. Health promotion by social cognitive means. *Health education & behavior* : the official publication of the Society for Public Health Education 2004;31(2):143-164. (In eng). DOI: 10.1177/1090198104263660 [doi].
2. Haun J, Luther S, Dodd V, Donaldson P. Measurement variation across health literacy assessments: implications for assessment selection in research and practice. *Journal of health communication* 2012;17 Suppl 3:141-159. (In eng). DOI: 10.1080/10810730.2012.712615 [doi].
3. Morley JE, Malmstrom TK, Miller DK. A simple frailty questionnaire (FRAIL) predicts outcomes in middle aged African Americans. *The journal of nutrition, health & aging* 2012;16(7):601-608. (In eng). DOI: 10.1007/s12603-012-0084-2 [doi].
4. National Library of Medicine - Medical Subject Headings (MeSH): "Exercise". (<https://www.ncbi.nlm.nih.gov/mesh/68015444>).
5. "Goal". Merriam-Webster English Dictionary. Online: Merriam-Webster, Inc.; 2023.
6. "Goal". Collins English Dictionary Online: Harper Collins; 2012.
7. National Library of Medicine - Medical Subject Headings (MeSH): "Rehabilitation". (<https://www.ncbi.nlm.nih.gov/mesh/68012046>).
8. National Library of Medicine - Medical Subjects Headings (MeSH): "Self-efficacy". (<https://www.ncbi.nlm.nih.gov/mesh/?term=self-efficacy>).
9. National Library of Medicine - Medical Subject Headings (MeSH): "Telemedicine". (<https://www.ncbi.nlm.nih.gov/mesh/?term=telemedicine>).
10. National Library of Medicine - Medical Subject Headings (MeSH): "Telerehabilitation" (<https://www.ncbi.nlm.nih.gov/mesh/?term=telerehabilitation>).

## Standards for Reporting Qualitative Research (SRQR) Checklist

| No. | Topic                                                                                     | Item                                                                                                                                                             |
|-----|-------------------------------------------------------------------------------------------|------------------------------------------------------------------------------------------------------------------------------------------------------------------|
| S1  | Title                                                                                     | We provided a concise description of the nature and topic of the study identifying the study as qualitative research (Page 1).                                   |
| S2  | Abstract                                                                                  | We provided a summary of key elements of the study using the abstract format of the intended publication (Pages 3-4).                                            |
| S3  | Problem formulation                                                                       | We provided a description and significant of the problem studied in the Introduction (Page 5).                                                                   |
| S4  | Purpose and research question                                                             | We described the purpose of the study and specific research questions in the Introduction (Page 5-6).                                                            |
| S5  | Qualitative approach and research paradigm                                                | We described the qualitative research approach (i.e., informative) and guiding theory (Bandura's Social Cognitive Theory) (Page 7).                              |
| S6  | Researcher characteristics and reflexivity                                                | We provided a description of the researcher characteristics (Page 6-7).                                                                                          |
| S7  | Context                                                                                   | We described the setting/site and salient contextual factors (Page 6).                                                                                           |
| S8  | Sampling strategy                                                                         | We provided description of the sampling of research participants (Page 6).                                                                                       |
| S9  | Ethical issues pertaining to human subjects                                               | We provided documentation of the approval of the appropriate ethics review board and participant consent (Page 6).                                               |
| S10 | Data collection methods                                                                   | We provided description of types of data collection including dates of analysis (Page 7).                                                                        |
| S11 | Data collection instruments and technologies                                              | We provided description of the interview guide and technology used for recording (Page 7).                                                                       |
| S12 | Units of study                                                                            | We provided the number and relevant characteristics of the participants (Page 6).                                                                                |
| S13 | Data processing                                                                           | We provided descriptions of methods of processing data prior to analysis including transcription and coding (Pages 7-8).                                         |
| S14 | Data analysis                                                                             | We described in detail the process by which themes were identified (Pages 7-8).                                                                                  |
| S15 | Techniques to enhance trustworthiness                                                     | We provided descriptions of techniques that enhanced the trustworthiness of study findings (Page 17).                                                            |
| S16 | Synthesis and interpretation                                                              | We described the main findings of salient themes (Pages 9-14).                                                                                                   |
| S17 | Units to empirical data                                                                   | We provided evidence using illustrative quotes to substantiate analytic findings (Pages 9-14).                                                                   |
| S18 | Integration with prior work, implications, transferability, and contribution to the field | We provided detailed integration of study findings to existing literature, discussed transferability, implications, and contribution to the field (Pages 14-17). |
| S19 | Limitations                                                                               | We provided descriptions of trustworthiness and limitations of study findings (Page 17).                                                                         |
| S20 | Conflicts of interest                                                                     | We provided a statement of conflict of interest (Page 19).                                                                                                       |
| S21 | Funding                                                                                   | We provided description of funding (Page 19).                                                                                                                    |
